# Supplementary material for: The Gut Microbiome Contributes to a Substantial Proportion of the Variation in Blood Lipids
Source: PubMed Central journal article supplement — Circ Res. 2015 Oct 8;117(9):817–24. doi: 10.1161/CIRCRESAHA.115.306807 (PMC4596485; doi:10.1161/circresaha.115.306807), 2015-10-08
Supplement: res-117-817-s001.pdf [file res-117-817-s001.pdf]

## Circulation Research

---

**From:** Platteel, M <m.platteel@umcg.nl>  
**Sent:** Monday, August 03, 2015 5:00 AM  
**To:** circulation.research@circresearch.com  
**Subject:** permission acknowledgements paper: The gut microbiome contributes to a substantial proportion of the variation in blood lipids

Dear sir / madam,

By this email i am giving permission for being mentioned in the acknowledgements in 'The gut microbiome contributes to a substantial proportion of the variation in blood lipids'

Regards,  
Mathieu Platteel

---

De inhoud van dit bericht is vertrouwelijk en alleen bestemd voor de geadresseerde(n). Anderen dan de geadresseerde(n) mogen geen gebruik maken van dit bericht, het niet openbaar maken of op enige wijze verspreiden of vermenigvuldigen. Het UMCG kan niet aansprakelijk gesteld worden voor een incomplete aankomst of vertraging van dit verzonden bericht.

The contents of this message are confidential and only intended for the eyes of the addressee(s). Others than the addressee(s) are not allowed to use this message, to make it public or to distribute or multiply this message in any way. The UMCG cannot be held responsible for incomplete reception or delay of this transferred message.

## Circulation Research

---

**From:** Senior Rogers, JL <j.l.senior@umcg.nl>  
**Sent:** Monday, August 03, 2015 4:42 AM  
**To:** circulation.research@circresearch.com  
**Cc:** Jingyuan Fu; Kate McIntyre  
**Subject:** J Fu et al. Acknowledgement

I agree to being acknowledged in the following manuscript

Re: CIRCRES/2015/306807/R1

### **The gut microbiome contributes to a substantial proportion of the variation in blood lipids**

Jingyuan Fu<sup>1,2</sup>, Marc Jan Bonder<sup>2</sup>, María Carmen Cenit<sup>2</sup>, Ettje Tigchelaar<sup>2,3</sup>, Astrid Maatman<sup>2</sup>, Jackie A.M. Dekens<sup>2,3</sup>, Eelke Brandsma<sup>1</sup>, Joanna Marczyńska<sup>2,4</sup>, Floris Imhann<sup>5</sup>, Rinse K. Weersma<sup>5</sup>, Lude Franke<sup>2</sup>, Tiffany W. Poon<sup>6</sup>, Ramnik J Xavier<sup>6,7,8</sup>, Dirk Gevers<sup>6</sup>, Marten H. Hofker<sup>1,\*</sup>, Cisca Wijmenga<sup>2,\*</sup>, Alexandra Zhernakova<sup>2,3,\*</sup>

Jackie Senior  
Editor, webmaster, Dept of Genetics, UMCG  
Tel. 030-6915176; cell 06-54924409

---

De inhoud van dit bericht is vertrouwelijk en alleen bestemd voor de geadresseerde(n). Anderen dan de geadresseerde(n) mogen geen gebruik maken van dit bericht, het niet openbaar maken of op enige wijze verspreiden of vermenigvuldigen. Het UMCG kan niet aansprakelijk gesteld worden voor een incomplete aankomst of vertraging van dit verzonden bericht.

The contents of this message are confidential and only intended for the eyes of the addressee(s). Others than the addressee(s) are not allowed to use this message, to make it public or to distribute or multiply this message in any way. The UMCG cannot be held responsible for incomplete reception or delay of this transferred message.
