# Supplementary material for: The Gut Microbiome Contributes to a Substantial Proportion of the Variation in Blood Lipids
Source: PubMed Central journal article supplement — Circ Res. 2015 Oct 8;117(9):817–24. doi: 10.1161/CIRCRESAHA.115.306807 (PMC4596485; doi:10.1161/circresaha.115.306807), 2015-10-08
Supplement: res-117-817-s002.pdf [file res-117-817-s002.pdf]

## Supplementary Material

### Table of Contents

|                                                                                                                                                     |           |
|-----------------------------------------------------------------------------------------------------------------------------------------------------|-----------|
| <b>Abbreviations used .....</b>                                                                                                                     | <b>2</b>  |
| <b>Online Table I. Spearman correlation between traits and OTU richness and diversity .....</b>                                                     | <b>3</b>  |
| <b>Online Table II: OTUs associated with BMI at FDR &lt; 0.05 level.....</b>                                                                        | <b>4</b>  |
| <b>Online Table III. OTUs associated with TG at FDR &lt; 0.05 level.....</b>                                                                        | <b>5</b>  |
| <b>Online Table IV. OTUs associated with HDL at FDR &lt; 0.05 level .....</b>                                                                       | <b>6</b>  |
| <b>Online Table V. Associated Taxonomies at FDR &lt; 0.05 level.....</b>                                                                            | <b>7</b>  |
| <b>Online Table VI. The association between microbes and the SNPs associated with lipids and BMI at P value <math>1 \times 10^{-5}</math> .....</b> | <b>12</b> |
| <b>Online Table VII. The associations between microbes and the combined BMI and lipid genetic risk scores at P &lt; 0.05 level .....</b>            | <b>13</b> |
| <b>Online Figure I. The workflow of the two-part model.....</b>                                                                                     | <b>14</b> |
| <b>Online Figure II. The number of OTUs associated with TG, HDL and BMI at FDR &lt; 0.05 and their overlaps with each other .....</b>               | <b>15</b> |
| <b>Online Figure III. The amount of variance in BMI and lipids explained by the gut microbiome.....</b>                                             | <b>16</b> |
| <b>Online Figure IV. The variation of lipids explained by age, gender, BMI, genetic and microbial risk. ....</b>                                    | <b>17</b> |

## **Abbreviations used**

BMI: body mass index

FDR: false discovery rate,  $\leq 0.05$

HDL: high-density lipoprotein cholesterol

LDL: low-density lipoprotein cholesterol

OTU: operational taxonomic unit

P: P value

R: Spearman correlation coefficient

TC: total cholesterol

TG: triglycerides

**Online Table I. Spearman correlation between traits and OTU richness and diversity**

|                        | Age         |                              | Gender*      |               | Adjusted for age and gender |                            |              |                             |              |                            |         |      |        |      |
|------------------------|-------------|------------------------------|--------------|---------------|-----------------------------|----------------------------|--------------|-----------------------------|--------------|----------------------------|---------|------|--------|------|
|                        | R           | P                            | R            | P             | BMI                         |                            | TG           |                             | HDL          |                            | LDL     |      | TC     |      |
|                        |             |                              |              |               | R                           | P                          | R            | P                           | R            | P                          | R       | P    | R      | P    |
| Richness <sup>#</sup>  | <b>0.23</b> | <b>5.87x10<sup>-12</sup></b> | <b>-0.09</b> | <b>0.0055</b> | <b>-0.12</b>                | <b>3.8x10<sup>-4</sup></b> | <b>-0.13</b> | <b>1.37x10<sup>-4</sup></b> | <b>0.112</b> | <b>8.3x10<sup>-4</sup></b> | -0.0028 | 0.93 | 0.0021 | 0.95 |
| Diversity <sup>§</sup> | <b>0.21</b> | <b>1.08x10<sup>-10</sup></b> | <b>-0.1</b>  | <b>0.0023</b> | <b>-0.08</b>                | <b>0.013</b>               | <b>-0.12</b> | <b>0.00032</b>              | <b>0.12</b>  | <b>0.00054</b>             | -0.054  | 0.11 | -0.04  | 0.2  |

\*Gender: negative value indicates the OTU diversity is less in men than in women

<sup>#</sup>Richness: the number of OTUs per sample

<sup>§</sup>Diversity: Shannon's diversity index

R: Spearman correlation coefficient; P: P value. Numbers in bold indicate the significant correlations at P < 0.05.

BMI: body mass index; TG: triglyceride, HDL: high-density lipoprotein cholesterol; LDL: low-density lipoprotein cholesterol, TC: total cholesterol

**Online Table II: OTUs associated with BMI at FDR < 0.05 level**

| OTU                                                                                                | Summary of OTUs reads |             |                      |          | Binary Model |         |          |          | Quantitative model |         |          |              | Meta Analysis |          | Final P value |
|----------------------------------------------------------------------------------------------------|-----------------------|-------------|----------------------|----------|--------------|---------|----------|----------|--------------------|---------|----------|--------------|---------------|----------|---------------|
|                                                                                                    | No. Absent            | No. Present | ln(Counts+1)/Present | Estimate | s.e.         | T value | P value  | Estimate | s.e.               | T value | P value  | Meta Z value | Meta P value  |          |               |
| 251395.k_Bacteria_p_Firmicutes_c_Clostridia_o_Clostridiales                                        | 357                   | 536         | 8.0391791            | -1.459   | 0.273        | -5.354  | 1.10E-07 | -0.065   | 0.10897            | -0.593  | 0.5532   | -4.17385     | 2.99E-05      | 1.10E-07 |               |
| 4299281.k_Bacteria_p_Firmicutes_c_Clostridia_o_Clostridiales                                       | 478                   | 415         | 29.3903614           | -1.38    | 0.266        | -5.181  | 2.74E-07 | 0.0589   | 0.08229            | 0.716   | 0.4745   | -3.1293      | 0.00175       | 2.74E-07 |               |
| 182031.k_Bacteria_p_Firmicutes_c_Clostridia_o_Clostridiales                                        | 94                    | 799         | 210.914894           | -1.415   | 0.437        | -3.237  | 0.001    | -0.188   | 0.04836            | -3.893  | 0.0001   | -5.02084     | 5.14E-07      | 5.14E-07 |               |
| 316911.k_Bacteria_p_Firmicutes_c_Clostridia_o_Clostridiales_f_Ruminococcales                       | 141                   | 752         | 16.5345745           | -1.157   | 0.368        | -3.142  | 0.002    | -0.369   | 0.09303            | -3.972  | 7.83E-05 | -5.00767     | 5.51E-07      | 5.51E-07 |               |
| 4368791.k_Bacteria_p_Firmicutes_c_Clostridia_o_Clostridiales                                       | 521                   | 372         | 18.8763441           | -1.082   | 0.274        | -3.95   | 8.44E-05 | -0.325   | 0.10276            | -3.159  | 0.0017   | -4.9975      | 5.81E-07      | 5.81E-07 |               |
| 3069358.k_Bacteria_p_Firmicutes_c_Clostridia_o_Clostridiales                                       | 249                   | 644         | 20.628882            | -1.145   | 0.299        | -3.833  | 1E-04    | -0.267   | 0.08203            | -3.255  | 0.0012   | -4.98997     | 6.04E-07      | 6.04E-07 |               |
| 193129.k_Bacteria_p_Firmicutes_c_Clostridia_o_Clostridiales                                        | 177                   | 716         | 29.2192737           | -1.146   | 0.338        | -3.394  | 7E-04    | -0.251   | 0.07019            | -3.583  | 0.0004   | -4.91257     | 8.99E-07      | 8.99E-07 |               |
| 1703711.k_Bacteria_p_Firmicutes_c_Clostridia_o_Clostridiales_f_Ruminococcales                      | 189                   | 704         | 30.6221591           | -1.187   | 0.333        | -3.593  | 3E-04    | -0.26    | 0.0783             | -3.323  | 0.0009   | -4.87056     | 1.11E-06      | 1.11E-06 |               |
| 345717.k_Bacteria_p_Firmicutes_c_Clostridia_o_Clostridiales_f_Ruminococcales                       | 611                   | 282         | 5.36879433           | -1.148   | 0.288        | -3.983  | 7.36E-05 | -0.463   | 0.15855            | -2.919  | 0.0038   | -4.85021     | 1.23E-06      | 1.23E-06 |               |
| 295743.k_Bacteria_p_Firmicutes_c_Clostridia_o_Clostridiales_f_Ruminococcales                       | 507                   | 386         | 37.8626943           | -1.302   | 0.271        | -4.808  | 1.79E-06 | -0.15    | 0.08019            | -1.876  | 0.0614   | -4.6998      | 2.60E-06      | 1.79E-06 |               |
| 312766.k_Bacteria_p_Firmicutes_c_Clostridia_o_Clostridiales_f_Ruminococcales                       | 477                   | 416         | 4.82451923           | -1.012   | 0.272        | -3.728  | 2E-04    | -0.417   | 0.14126            | -2.953  | 0.0033   | -4.70153     | 2.58E-06      | 2.58E-06 |               |
| 584417.k_Bacteria_p_Firmicutes_c_Clostridia_o_Clostridiales                                        | 466                   | 427         | 29.3747073           | -1.215   | 0.268        | -4.54   | 6.39E-06 | -0.16    | 0.0801             | -1.995  | 0.0466   | -4.59813     | 4.26E-06      | 4.26E-06 |               |
| 192201.k_Bacteria_p_Firmicutes_c_Clostridia_o_Clostridiales                                        | 66                    | 827         | 103.347037           | 0.528    | 0.515        | 1.0259  | 0.305    | 0.3327   | 0.07278            | 4.571   | 5.60E-06 | 3.93593      | 8.29E-05      | 5.60E-06 |               |
| 179664.k_Bacteria_p_Firmicutes_c_Clostridia_o_Clostridiales                                        | 282                   | 611         | 119.807725           | -1.111   | 0.288        | -3.861  | 1E-04    | -0.152   | 0.06108            | -2.481  | 0.0134   | -4.46737     | 7.92E-06      | 7.92E-06 |               |
| 192144.k_Bacteria_p_Firmicutes_c_Clostridia_o_Clostridiales                                        | 519                   | 374         | 2.36898396           | 1.032    | 0.271        | 3.8107  | 1E-04    | 0.5482   | 0.22986            | 2.385   | 0.0176   | 4.361738     | 1.29E-05      | 1.29E-05 |               |
| 4307785.k_Bacteria_p_Firmicutes_c_Clostridia_o_Clostridiales                                       | 536                   | 357         | 5.72630252           | -0.76    | 0.274        | -2.771  | 0.006    | -0.535   | 0.16527            | -3.239  | 0.0013   | -4.22667     | 2.37E-05      | 2.37E-05 |               |
| 183187.k_Bacteria_p_Firmicutes_c_Clostridia_o_Clostridiales_f_Ruminococcales                       | 442                   | 451         | 8.9002217            | -0.663   | 0.269        | -2.468  | 0.014    | -0.445   | 0.12881            | -3.457  | 0.0006   | -4.16803     | 3.07E-05      | 3.07E-05 |               |
| 189878.k_Bacteria_p_Firmicutes_c_Clostridia_o_Clostridiales_f_Ruminococcales_f_Lachnospiraceae     | 493                   | 400         | 45.675               | -1.12    | 0.268        | -4.173  | 3.30E-05 | 0.1346   | 0.08124            | 1.657   | 0.0984   | -1.76714     | 0.0721        | 3.30E-05 |               |
| 3997272.k_Bacteria_p_Bacteroidetes_c_Bacteroidia_o_Bacteroidales_f_B24-7(Barnesiellaceae)          | 169                   | 724         | 32.1643646           | -1.388   | 0.34         | -4.083  | 4.84E-05 | 0.0261   | 0.0739             | 0.353   | 0.7241   | -2.62344     | 0.0087        | 4.84E-05 |               |
| 811768.k_Bacteria_p_Proteobacteria_c_Betaproteobacteria_o_Burkholderiales_f_Rhodocyclales          | 574                   | 319         | 4.46081505           | -1.134   | 0.279        | -4.061  | 5.33E-05 | -0.266   | 0.15556            | -1.708  | 0.0885   | -4.06153     | 4.88E-05      | 4.88E-05 |               |
| 165137.k_Bacteria_p_Firmicutes_c_Clostridia_o_Clostridiales                                        | 187                   | 706         | 9.28328612           | 0.073    | 0.33         | 0.2199  | 0.826    | 0.3841   | 0.0961             | 3.997   | 7.11E-05 | 2.964569     | 0.0003        | 7.11E-05 |               |
| 119310.k_Bacteria_p_Firmicutes_c_Clostridia_o_Clostridiales_f_Ruminococcales                       | 675                   | 218         | 5.2018349            | -1.231   | 0.311        | -3.959  | 8.13E-05 | -0.171   | 0.15264            | -1.123  | 0.2627   | -5.75786     | 0.00035       | 8.13E-05 |               |
| 218924.k_Bacteria_p_Bacteroidetes_c_Bacteroidia_o_Bacteroidales_f_Rikenellaceae                    | 277                   | 616         | 10.25                | -1.141   | 0.288        | -3.957  | 8.20E-05 | -0.042   | 0.09572            | -0.44   | 0.6599   | -3.09614     | 0.00196       | 8.20E-05 |               |
| 313600.k_Bacteria_p_Firmicutes_c_Clostridia_o_Clostridiales                                        | 695                   | 198         | 8.88888889           | -1.276   | 0.323        | -3.955  | 8.25E-05 | 0.2321   | 0.16568            | 1.401   | 0.1629   | -1.79703     | 0.07233       | 8.25E-05 |               |
| 174353.k_Bacteria_p_Firmicutes_c_Clostridia_o_Clostridiales                                        | 442                   | 451         | 8.1286031            | -1.025   | 0.269        | -3.809  | 1E-04    | -0.187   | 0.10549            | -1.77   | 0.0774   | -3.93068     | 8.47E-05      | 8.47E-05 |               |
| 329767.k_Bacteria_p_Firmicutes_c_Clostridia_o_Clostridiales                                        | 542                   | 351         | 20.8347578           | -1.067   | 0.275        | -3.874  | 1E-04    | -0.006   | 0.09295            | -0.066  | 0.9477   | -2.77363     | 0.00554       | 0.00011  |               |
| 42458.k_Bacteria_p_Firmicutes_c_Clostridia_o_Clostridiales_f_Ruminococcales                        | 693                   | 200         | 3.59                 | -0.49    | 0.323        | -1.515  | 0.13     | -0.309   | 0.2352             | -3.86   | 0.0002   | -3.74711     | 0.00018       | 0.00015  |               |
| 162844.k_Bacteria_p_Firmicutes_c_Clostridia_o_Clostridiales_f_Ruminococcales_f_Lachnospiraceae     | 187                   | 706         | 5.51133144           | 0.881    | 0.329        | 2.6772  | 0.008    | 0.3055   | 0.14116            | 2.676   | 0.0078   | 3.775683     | 0.00016       | 0.00016  |               |
| 178389.k_Bacteria_p_Firmicutes_c_Clostridia_o_Clostridiales                                        | 335                   | 558         | 136.121864           | -1.033   | 0.276        | -3.748  | 2E-04    | 0.0147   | 0.05648            | 0.261   | 0.7946   | -2.75514     | 0.01408       | 0.00019  |               |
| 326539.k_Bacteria_p_Firmicutes_c_Clostridia_o_Clostridiales                                        | 784                   | 109         | 7.02752394           | -1.433   | 0.413        | -3.467  | 6E-04    | -0.415   | 0.23032            | -1.804  | 0.0741   | -3.70933     | 0.00021       | 0.00021  |               |
| 182864.k_Bacteria_p_Firmicutes_c_Clostridia_o_Clostridiales_f_Lachnospiraceae_f_Blaustia           | 480                   | 413         | 2.24213075           | 0.994    | 0.268        | 3.713   | 2E-04    | -0.027   | 0.23519            | -0.114  | 0.909    | 2.53766      | 0.01128       | 0.00022  |               |
| 4455005.k_Bacteria_p_Firmicutes_c_Clostridia_o_Clostridiales_f_Mogibacteriaceae                    | 611                   | 282         | 9.5567759            | -0.506   | 0.294        | -1.721  | 0.086    | -0.502   | 0.14162            | -3.547  | 0.0005   | -3.69396     | 0.00022       | 0.00022  |               |
| 174571.k_Bacteria_p_Firmicutes_c_Clostridia_o_Clostridiales                                        | 545                   | 348         | 2.94258784           | 0.315    | 0.277        | 1.1385  | 0.255    | 0.7033   | 0.19011            | 3.7     | 0.0003   | 3.393005     | 0.00069       | 0.00025  |               |
| 370063.k_Bacteria_p_Firmicutes_c_Clostridia_o_Clostridiales                                        | 439                   | 454         | 10.4515419           | -0.741   | 0.269        | -2.753  | 0.006    | -0.268   | 0.11093            | -2.418  | 0.016    | -3.64883     | 0.00027       | 0.00027  |               |
| 165334.k_Bacteria_p_Firmicutes_c_Clostridia_o_Clostridiales_f_Christensenellaceae                  | 622                   | 271         | 27.1586716           | -0.966   | 0.296        | -3.266  | 0.001    | -0.209   | 0.11001            | -1.904  | 0.058    | -3.64259     | 0.00027       | 0.00027  |               |
| 4474703.k_Bacteria_p_Firmicutes_c_Clostridia_o_Clostridiales                                       | 153                   | 740         | 13.4810811           | -0.856   | 0.36         | -2.378  | 0.018    | -0.271   | 0.09811            | -2.762  | 0.0059   | -3.62579     | 0.00029       | 0.00029  |               |
| 34789.k_Bacteria_p_Firmicutes_c_Clostridia_o_Clostridiales_f_Christensenellaceae                   | 669                   | 224         | 3.61160714           | -0.709   | 0.315        | -2.253  | 0.025    | -0.628   | 0.21808            | -2.879  | 0.0044   | -3.60455     | 0.00031       | 0.00031  |               |
| 447859.k_Bacteria_p_Tenericutes_c_RF3o_M16151-28                                                   | 813                   | 80          | 4.85                 | -1.698   | 0.47         | -3.612  | 3E-04    | 0.0055   | 0.25501            | 0.022   | 0.9828   | -5.25905     | 0.01144       | 0.00032  |               |
| 191874.k_Bacteria_p_Firmicutes_c_Clostridia_o_Clostridiales_f_Ruminococcales_f_Ruminococcus        | 586                   | 307         | 2.51140065           | -0.072   | 0.284        | -0.254  | 0.8      | -0.805   | 0.22455            | -3.585  | 0.0004   | -3.68623     | 0.00073       | 0.00039  |               |
| 556564.k_Bacteria_p_Firmicutes_c_Clostridia_o_Clostridiales                                        | 516                   | 377         | 9.47214854           | -0.974   | 0.275        | -3.539  | 4E-04    | -0.083   | 0.11135            | -0.744  | 0.4572   | -3.01902     | 0.00254       | 0.00042  |               |
| 531038.k_Bacteria_p_Firmicutes_c_Clostridia_o_Clostridiales                                        | 735                   | 158         | 14.8987342           | -1.247   | 0.352        | -3.539  | 4E-04    | 0.1229   | 0.13891            | 0.885   | 0.3777   | -1.8692      | 0.06159       | 0.00042  |               |
| 192741.k_Bacteria_p_Firmicutes_c_Clostridia_o_Clostridiales                                        | 475                   | 418         | 6.99043062           | -0.951   | 0.269        | -3.535  | 4E-04    | -0.099   | 0.12736            | -0.775  | 0.4388   | -3.03738     | 0.00239       | 0.00043  |               |
| 175962.k_Bacteria_p_Firmicutes_c_Clostridia_o_Clostridiales_f_Ruminococcales                       | 814                   | 79          | 6.65822785           | -1.665   | 0.473        | -3.521  | 5E-04    | 0.5688   | 0.26691            | 2.131   | 0.0364   | -1.00058     | 0.31703       | 0.00045  |               |
| 184665.k_Bacteria_p_Firmicutes_c_Clostridia_o_Clostridiales                                        | 14                    | 879         | 83.252597            | 0        | 0            | 0       | 1        | 0.2822   | 0.08058            | 3.502   | 0.0005   | 2.467139     | 0.01362       | 0.00048  |               |
| 180503.k_Bacteria_p_Verrucomicrobia_c_Verrucomicrobia_o_Verrucomicrobiales_f_Abitarmatium_mauritii | 245                   | 648         | 282.804012           | -0.579   | 0.304        | -1.903  | 0.057    | -0.147   | 0.04887            | -3.01   | 0.0027   | -3.46369     | 0.00053       | 0.00053  |               |
| 289562.k_Bacteria_p_Firmicutes_c_Clostridia_o_Clostridiales_f_Ruminococcales                       | 833                   | 60          | 11.25                | -1.845   | 0.537        | -3.439  | 6E-04    | -0.227   | 0.2555             | -0.887  | 0.379    | -3.04473     | 0.00233       | 0.00061  |               |
| 201772.k_Bacteria_p_Firmicutes_c_Clostridia_o_Clostridiales                                        | 373                   | 520         | 2.55                 | 0.92     | 0.271        | 3.3987  | 7E-04    | -0.065   | 0.19264            | -0.34   | 0.7342   | 2.1547       | 0.03119       | 0.00071  |               |
| 317749.k_Bacteria_p_Firmicutes_c_Clostridia_o_Clostridiales                                        | 543                   | 350         | 5.90857148           | -0.931   | 0.275        | -3.391  | 7E-04    | -0.059   | 0.14057            | -0.422  | 0.6736   | -2.68712     | 0.00071       | 0.00073  |               |
| 15305_Archaea_f_Thaumarchaeota_c_Methanobrevibacterium_f_Methanobrevibacterium                     | 393                   | 500         | 337.278              | -0.54    | 0.274        | -1.968  | 0.049    | -0.153   | 0.05439            | -2.821  | 0.0005   | -3.37555     | 0.00074       | 0.00074  |               |
| 447980.k_Bacteria_p_Bacteroidetes_c_Bacteroidia_o_Bacteroidales_f_Bacteroidaceae_f_Rikenellaceae   | 64                    | 829         | 51.3281062           | -0.411   | 0.521        | -0.788  | 0.431    | -0.223   | 0.06623            | -3.369  | 0.0008   | -2.93054     | 0.00338       | 0.00079  |               |
| 437939.k_Bacteria_p_Bacteroidetes_c_Bacteroidia_o_Bacteroidales_f_Bacteroidaceae_f_Bacteroides     | 436                   | 457         | 26.249453            | -0.838   | 0.268        | -3.13   | 0.002    | -0.131   | 0.08486            | -1.541  | 0.1241   | -3.29409     | 0.00099       | 0.00099  |               |
| 293858.k_Bacteria_p_Firmicutes_c_Clostridia_o_Clostridiales                                        | 196                   | 697         | 78.1764706           | -1.067   | 0.323        | -3.302  | 1E-03    | -0.068   | 0.05614            | -1.219  | 0.2231   | -3.18846     | 0.00143       | 0.001    |               |
| 173921.k_Bacteria_p_Firmicutes_c_Clostridia_o_Clostridiales_f_Christensenellaceae                  | 528                   | 365         | 4.03013699           | -0.89    | 0.272        | -3.274  | 0.001    | -0.197   | 0.15345            | -1.285  | 0.1998   | -3.21401     | 0.00131       | 0.0011   |               |
| 366748.k_Bacteria_p_Firmicutes_c_Clostridia_o_Clostridiales                                        | 41                    | 852         | 98.1760563           | -0.469   | 0.643        | -0.73   | 0.466    | -0.226   | 0.06907            | -3.267  | 0.0011   | -2.81825     | 0.00483       | 0.00113  |               |
| 2824376.k_Bacteria_p_Firmicutes_c_Clostridia_o_Clostridiales                                       | 461                   | 432         | 40.4791667           | 0.874    | 0.268        | 3.2654  | 0.001    | 0.0706   | 0.07766            | 0.909   | 0.3638   | 2.9436       | 0.00324       | 0.00113  |               |
| 177757.k_Bacteria_p_Bacteroidetes_c_Bacteroidia_o_Bacteroidales_f_Odoribacteraceae_f_Odoribacter   | 316                   | 577         | 5.7712305            | -0.763   | 0.281        | -2.717  | 0.007    | -0.213   | 0.11305            | -1.887  | 0.0596   | -3.24838     | 0.00116       | 0.00116  |               |
| 4480944.k_Bacteria_p_Firmicutes_c_Clostridia                                                       | 53                    | 840         | 294.242857           | -1.23    | 0.568        | -2.166  | 0.031    | -0.113   | 0.04644            | -2.434  | 0.0151   | -3.24734     | 0.00116       | 0.00116  |               |
| 178137.k_Bacteria_p_Firmicutes_c_Clostridia_o_Clostridiales_f_Lachnospiraceae                      | 50                    | 843         | 17.9632266           | 1.026    | 0.587        | 1.7483  | 0.081    | 0.2493   | 0.08786            | 2.837   | 0.0047   | 3.235756     | 0.00121       | 0.00121  |               |
| 196275.k_Bacteria_p_Firmicutes_c_Clostridia_o_Clostridiales                                        | 52                    | 841         | 240.737218           | -1.844   | 0.571        | -3.229  | 0.001    | 0.0033   | 0.05013            | 0.066   |          |              |               |          |               |

**Online Table III. OTUs associated with TG at FDR < 0.05 level**

| OTU                                                                      | Summary of OTU reads |             |             |                 | Binary Model |              |            |             | Quantitative model |             |             |             | Meta Analysis |              |               |
|--------------------------------------------------------------------------|----------------------|-------------|-------------|-----------------|--------------|--------------|------------|-------------|--------------------|-------------|-------------|-------------|---------------|--------------|---------------|
|                                                                          | No. Abund            | No. Present | Estimate    | Log2(Count+0.5) | Estimate     | s.e.         | T value    | P value     | Estimate           | s.e.        | T value     | P value     | Meta Z value  | Meta P value | Final P value |
| 03123X_Bacteroidetes_Firmicutes_Clostridia_Clostridiales                 | 277                  | 710         | 29.2937374  | -0.27614159     | 0.00504952   | -4.8891281   | 8.09E-06   | -0.06653288 | 0.01251631         | -7.88246059 | 0.00015858  | 5.818680484 | 5.92E-09      | 5.88E-09     | 5.88E-09      |
| 179645X_Bacteroidetes_Firmicutes_Clostridia_Clostridiales                | 182                  | 411         | 119.8772504 | -0.1793582      | 0.01180868   | -2.4404224   | 0.00667672 | -0.04379151 | 0.01402743         | -4.0494202  | 5.88E-05    | -5.26977899 | 1.52E-07      | 1.52E-07     | 1.52E-07      |
| 101751X_Bacteroidetes_Firmicutes_Clostridia_Clostridiales                | 403                  | 483         | 67.02098485 | -0.254004       | 0.04887913   | -5.288861507 | 1.91E-07   | -0.03984641 | 0.01231395         | -9.0007777  | 0.00376505  | -4.55955242 | 1.52E-05      | 1.91E-07     |               |
| 4065051X_Bacteroidetes_Firmicutes_Clostridia_Clostridiales               | 144                  | 749         | 30.1775200  | -0.23112745     | 0.06569792   | -3.548054969 | 0.00047727 | 0.0466674   | 0.01322072         | -3.70875104 | 0.00027251  | -5.16647833 | 6.28E-07      | 3.28E-07     |               |
| 182031X_Bacteroidetes_Firmicutes_Clostridia_Clostridiales                | 94                   | 789         | 201.9148934 | -0.15291926     | 0.07933836   | -1.92741277  | 0.05424663 | -0.04532231 | 0.00686706         | -5.12625107 | 7.71E-07    | -4.9534404  | 7.22E-07      | 3.71E-07     |               |
| 215195X_Bacteroidetes_Firmicutes_Clostridia_Clostridiales                | 357                  | 538         | 308.1791504 | -0.25173727     | 0.04915249   | -5.1740385   | 1.80E-07   | -0.01244002 | 0.01929884         | -6.64985258 | 0.01598213  | -6.05058363 | 5.11E-05      | 3.80E-07     |               |
| 175922X_Bacteroidetes_Firmicutes_Clostridia_Clostridiales_Ruminococales  | 814                  | 79          | 6.65229704  | -0.42072094     | 0.08425915   | -5.07685429  | 4.61E-07   | 0.02237846  | 0.03045273         | 1.90136204  | 0.06058898  | -2.8020232  | 0.02570264    | 6.61E-07     |               |
| 17453X_Bacteroidetes_Firmicutes_Clostridia_Clostridiales                 | 462                  | 651         | 8.28868394  | -0.2224973      | 0.08292792   | -4.61647818  | 4.48E-06   | 0.07726275  | 0.01884336         | -3.937725   | 0.01665664  | -5.07292383 | 4.97E-07      | 4.97E-07     |               |
| 171789X_Bacteroidetes_Firmicutes_Clostridia_Clostridiales                | 543                  | 350         | 5.50879129  | -0.24137138     | 0.04911821   | -4.7924183   | 2.18E-06   | -0.07869111 | 0.01402025         | -2.35120211 | 0.01927517  | -5.02089907 | 5.62E-07      | 5.62E-07     |               |
| 262476X_Bacteroidetes_Firmicutes_Clostridia_Clostridiales                | 461                  | 428         | 40.4792887  | -0.19935643     | 0.08870789   | -2.80421214  | 7.18E-05   | 0.04491422  | 0.01491666         | -1.0897997  | 0.02032762  | -4.96464236 | 6.18E-07      | 6.18E-07     |               |
| 4176702X_Bacteroidetes_Firmicutes_Clostridia_Clostridiales               | 153                  | 740         | 13.46188199 | -0.23138307     | 0.05745249   | -3.61230911  | 0.00062366 | -0.05947652 | 0.01739903         | -3.46932459 | 0.00087756  | -4.94160382 | 7.75E-07      | 7.75E-07     |               |
| 808564X_Bacteroidetes_Firmicutes_Clostridia_Clostridiales                | 240                  | 644         | 20.62888199 | -0.21648027     | 0.03828477   | -4.02131525  | 6.21E-05   | -0.04533424 | 0.01504465         | -2.96029278 | 0.0038947   | -4.95269293 | 8.82E-07      | 8.82E-07     |               |
| 101731X_Bacteroidetes_Firmicutes_Clostridia_Clostridiales_Ruminococales  | 466                  | 427         | 29.5740704  | -0.20182462     | 0.04829202   | -4.17898793  | 1.22E-05   | -0.03786049 | 0.01479603         | -2.5430903  | 0.0109960   | -4.97937298 | 2.16E-06      | 2.16E-06     |               |
| 1187911X_Bacteroidetes_Firmicutes_Clostridia_Clostridiales_Ruminococales | 189                  | 704         | 30.6215900  | -0.22819834     | 0.05955504   | -3.78977139  | 0.00051531 | 0.03887041  | 0.01308741         | -2.76429212 | 0.0058487   | -4.92455884 | 1.77E-06      | 3.70E-06     |               |
| 4368791X_Bacteroidetes_Firmicutes_Clostridia_Clostridiales               | 521                  | 322         | 18.8734409  | -0.20579677     | 0.09375151   | -3.96694293  | 7.47E-05   | -0.08224551 | 0.01124459         | -5.48179752 | 0.01134459  | -5.48179752 | 4.55E-06      | 4.55E-06     |               |
| 117078X_Bacteroidetes_Firmicutes_Clostridia_Clostridiales_Chloroflexales | 403                  | 483         | 7.12629396  | -0.18280103     | 0.04284166   | -3.78576228  | 0.00043916 | -0.05812601 | 0.02052101         | -2.71889158 | 0.00789415  | -4.97309297 | 4.67E-06      | 4.67E-06     |               |
| 10071X_Bacteroidetes_Firmicutes_Clostridia_Clostridiales_Chloroflexales  | 684                  | 209         | 37.22059496 | -0.00807948     | 0.05737055   | -0.17107219  | 0.86424071 | 0.15921419  | 0.02251704         | 4.78E-06    | 0.13146071  | 0.00489461  | 4.78E-06      | 4.78E-06     |               |
| 139973X_Bacteroidetes_Firmicutes_Clostridia_Clostridiales_Chloroflexales | 767                  | 126         | 8.39625190  | -0.25416882     | 0.06112658   | -3.67458716  | 0.00021613 | 0.11619701  | 0.01448283         | -2.71261194 | 0.0076406   | -4.77667875 | 7.65E-06      | 7.65E-06     |               |
| 17838X_Bacteroidetes_Firmicutes_Clostridia_Clostridiales                 | 353                  | 558         | 1.38612848  | -0.36687774     | 0.09597978   | -4.16570882  | 3.40E-05   | 0.03217963  | 0.00989695         | -2.12626249 | 0.03727266  | -4.4203747  | 9.33E-06      | 9.33E-06     |               |
| 4407781X_Bacteroidetes_Firmicutes_Clostridia_Clostridiales               | 536                  | 357         | 5.73910232  | -0.31797607     | 0.04904874   | -4.43847854  | 1.02E-05   | -0.04972469 | 0.01902389         | -1.58063019 | 0.11407458  | -4.2777302  | 7.26E-05      | 1.02E-05     |               |
| 174749X_Bacteroidetes_Firmicutes_Bacteroidetes_Syntrophomonadaceae       | 580                  | 783         | 22.88017899 | -0.21146688     | 0.04888111   | -4.00711807  | 1.10E-06   | 0.02182441  | 0.01191842         | -6.05026104 | 0.00479731  | -5.22252399 | 0.00029787    | 1.99E-05     |               |
| 101730X_Bacteroidetes_Firmicutes_Clostridia_Clostridiales_Ruminococales  | 507                  | 386         | 37.3033681  | -0.21355878     | 0.06687076   | -4.20068174  | 1.10E-06   | -0.01630023 | 0.01008878         | -1.98023768 | 0.7983214   | -1.8912671  | 0.03101044    | 4.24E-05     |               |
| 4488481X_Bacteroidetes_Firmicutes_Clostridia_Clostridiales               | 53                   | 880         | 246.3428751 | -0.14523426     | 0.10178752   | -1.40866756  | 0.11480446 | -0.03547683 | 0.00812759         | -1.45137894 | 1.58E-05    | -4.06143565 | 1.87E-05      | 1.58E-05     |               |
| 108979X_Bacteroidetes_Firmicutes_Clostridia_Clostridiales                | 7                    | 880         | 246.3428751 | 0               | 0            | 0            | 0          | 0           | 0                  | 0           | 0           | 0           | 0             | 0            |               |
| 841891X_Bacteroidetes_Firmicutes_Clostridia_Clostridiales_Chloroflexales | 181                  | 712         | 24.58132325 | -0.25651089     | 0.05971151   | -4.20374051  | 1.96E-05   | -0.07486562 | 0.01374641         | -3.424214   | 0.17862285  | -3.98814868 | 7.24E-05      | 1.96E-05     |               |
| 101731X_Bacteroidetes_Firmicutes_Clostridia_Clostridiales                | 511                  | 382         | 16.5507487  | -0.13085857     | 0.08081117   | -2.67868811  | 0.00761078 | 0.06642677  | 0.01988524         | -1.35287561 | 0.00899505  | -4.9393671  | 2.24E-05      | 2.24E-05     |               |
| 370053X_Bacteroidetes_Firmicutes_Clostridia_Clostridiales                | 403                  | 464         | 10.45154185 | -0.19894241     | 0.08262325   | -3.12627015  | 4.10E-05   | -0.08075554 | 0.02066237         | -1.89716033 | 0.01680265  | -4.18831617 | 1.25E-05      | 1.25E-05     |               |
| 1620251X_Bacteroidetes_Firmicutes_Clostridia_Clostridiales               | 66                   | 827         | 103.3470375 | -0.10888147     | 0.02049554   | -1.17464181  | 0.24045593 | 0.05462602  | 0.01286818         | 4.18914693  | 0.00678415  | 0.18300231  | 2.97E-05      | 2.97E-05     |               |
| 4181952X_Bacteroidetes_Firmicutes_Clostridia_Clostridiales               | 756                  | 137         | 5.39410084  | -0.27892217     | 0.06671015   | -3.11973042  | 3.21E-05   | -0.02915197 | 0.01426759         | -4.97813917 | 0.016917295 | -2.9702384  | 0.00069433    | 3.21E-05     |               |
| 4412959X_Bacteroidetes_Firmicutes_Clostridia_Clostridiales               | 240                  | 653         | 56.1182944  | -0.16977942     | 0.05442628   | -3.1912449   | 0.00087031 | -0.06279322 | 0.01554568         | -2.52811902 | 0.00074054  | -4.1928497  | 6.88E-05      | 3.48E-05     |               |
| 201658X_Bacteroidetes_Firmicutes_Clostridia_Clostridiales                | 196                  | 697         | 78.1764709  | -0.05489679     | 0.08662628   | -0.9058029   | 0.34862789 | -0.02467001 | 0.0202738          | -4.1388469  | 0.010105    | -3.6558497  | 0.00036304    | 6.92E-05     |               |
| 101731X_Bacteroidetes_Firmicutes_Clostridia_Clostridiales                | 455                  | 458         | 46.87878029 | -0.18817792     | 0.04705151   | -4.05117795  | 4.41E-06   | -0.03199411 | 0.01721292         | -1.77092802 | 0.0800207   | -4.12049475 | 1.09E-05      | 4.09E-05     |               |
| 420001X_Bacteroidetes_Firmicutes_Clostridia_Clostridiales                | 678                  | 417         | 29.20268169 | -0.19766127     | 0.06218411   | -4.09791887  | 1.43E-05   | 0.00768029  | 0.01189173         | 0.44051129  | 0.4706986   | -2.3384817  | 0.00041044    | 6.24E-05     |               |
| 967968X_Bacteroidetes_Firmicutes_Clostridia_Clostridiales                | 41                   | 853         | 98.17050534 | -0.25345043     | 0.11571327   | -2.19123202  | 0.02662636 | -0.0473871  | 0.01238275         | -3.56288691 | 0.00081761  | -4.96016724 | 7.90E-06      | 4.69E-05     |               |
| 302741X_Bacteroidetes_Firmicutes_Clostridia_Clostridiales                | 475                  | 418         | 6.99043022  | -0.17090089     | 0.04803483   | -4.09988023  | 4.93E-05   | -0.07249248 | 0.02188003         | -2.78857575 | 0.43082838  | -4.27314612 | 0.00047041    | 4.93E-05     |               |
| 178385X_Bacteroidetes_Firmicutes_Clostridia_Clostridiales_Ruminococales  | 311                  | 382         | 3.2127272   | -0.20616456     | 0.05005811   | -4.07736032  | 4.97E-05   | -0.09685157 | 0.01600097         | -3.70911414 | 0.17183634  | -1.9055701  | 0.00174970    | 4.97E-05     |               |
| 187155X_Bacteroidetes_Firmicutes_Clostridia_Clostridiales                | 70                   | 623         | 9.58661625  | -0.13761764     | 0.08009597   | -1.52768848  | 0.13084621 | 0.07989042  | 0.01932965         | 4.03047076  | 0.0047066   | -3.91429693 | 9.07E-05      | 6.00E-05     |               |
| 448891X_Bacteroidetes_Firmicutes_Clostridia_Clostridiales                | 538                  | 355         | 16.45702651 | -0.19751312     | 0.04901246   | -4.02520461  | 1.18E-05   | -0.04548688 | 0.01474247         | -1.46277901 | 0.14497377  | -3.86100567 | 0.00011161    | 6.88E-05     |               |
| 4448734X_Bacteroidetes_Firmicutes_Clostridia_Clostridiales_Ruminococales | 807                  | 86          | 20.0212531  | -0.32782724     | 0.01884884   | -3.99911849  | 6.89E-05   | -0.03188119 | 0.01741505         | -1.98575325 | 0.32713708  | -1.98575325 | 0.00046029    | 6.88E-05     |               |
| 214824X_Bacteroidetes_Firmicutes_Clostridia_Clostridiales_Bacteroidetes  | 277                  | 616         | 10.35       | -0.23074888     | 0.02505409   | -3.99546742  | 6.98E-05   | -0.05666806 | 0.01717755         | -0.97027204 | 0.32291641  | -4.99737768 | 0.00069335    | 6.98E-05     |               |
| 101731X_Bacteroidetes_Firmicutes_Clostridia_Clostridiales_Ruminococales  | 226                  | 667         | 3.15742189  | -0.08472789     | 0.05614037   | -1.76982137  | 0.07710004 | 0.10081371  | 0.02779469         | 3.84460213  | 0.00031451  | 3.95787863  | 7.69E-05      | 7.69E-05     |               |
| 101731X_Bacteroidetes_Firmicutes_Clostridia_Clostridiales                | 680                  | 214         | 7.74860759  | -0.22827493     | 0.07574602   | -3.96645904  | 7.89E-05   | -0.03718482 | 0.01878266         | -1.3118472  | 0.18917669  | -3.7892975  | 0.00019077    | 7.98E-05     |               |
| 188565X_Bacteroidetes_Firmicutes_Clostridia_Clostridiales                | 227                  | 656         | 77.85283275 | -0.21742973     | 0.05489693   | -3.96499904  | 7.94E-05   | 0.00028130  | 0.01137719         | 0.302008    | 0.17194648  | -2.1457722  | 0.01125918    | 7.94E-05     |               |
| 101731X_Bacteroidetes_Firmicutes_Clostridia_Clostridiales                | 426                  | 417         | 14.84889472 | -0.18810889     | 0.04889419   | -4.09176817  | 1.43E-05   | 0.00768029  | 0.01189173         | 1.86477967  | 0.01044761  | -2.9944814  | 0.00037727    | 1.43E-05     |               |
| 840804X_Bacteroidetes_Firmicutes_Clostridia_Clostridiales                | 363                  | 526         | 11.41581881 | -0.07893732     | 0.04613203   | -1.95886859  | 0.11706818 | 0.07154168  | 0.04825756         | 3.9165247   | 0.00000553  | 3.81617103  | 0.00000031    | 0.0001       |               |
| 279370X_Bacteroidetes_Firmicutes_Clostridia_Clostridiales                | 226                  | 657         | 24.26179694 | -0.21118924     | 0.05412851   | -3.87766693  | 0.00011310 | -0.01174178 | 0.01051033         | -1.11661178 | 0.26475751  | -1.51737004 | 0.00041930    | 0.0001       |               |
| 174645X_Bacteroidetes_Firmicutes_Clostridia_Clostridiales                | 18                   | 875         | 13.1022871  | -0.2635472      | 0.01911887   | -4.0142198   | 0          | 0           | 0                  | 0           | 0           | 0           | 0             | 0            |               |
| 101731X_Bacteroidetes_Firmicutes_Clostridia_Clostridiales                | 826                  | 67          | 10.28865472 | -0.35141987     | 0.05144654   | -3.84288183  | 0.00013027 | 0.05241671  | 0.01739884         | 1.46032059  | 0.00043066  | -1.72521392 | 0.00497494    | 0.0001       |               |
| 4172061X_Bacteroidetes_Firmicutes_Clostridia_Clostridiales               | 9                    | 884         | 58.5070721  | 0               | 0            | 0            | 0          | 0           | 0                  | 0           | 0           | 0           | 0             | 0            |               |
| 317814X_Bacteroidetes_Firmicutes_Clostridia_Clostridiales                | 196                  | 607         | 6.62072704  | -0.17710526     | 0.05849698   | -3.62491799  | 0.00255841 | -0.04861931 | 0.02077709         | -2.38359705 | 0.01741805  | -1.81428129 | 0.00013628    | 0.0001       |               |
| 101731X_Bacteroidetes_Firmicutes_Clostridia_Clostridiales                | 44                   | 849         | 41.70789164 | -0.17159214     | 0.03188641   | -3.18866041  | 0.00087629 | -0.02348117 | -0.0573179         | 0.9300      |             |             |               |              |               |

Online Table IV. OTUs associated with HDL at FDR < 0.05 level

| OTU                                                                                                                | Summary of OTUs reads |             |                      | Binary Model |       |          |          | Quantitative model |       |          |          | Meta Analysis |              | Final P value |
|--------------------------------------------------------------------------------------------------------------------|-----------------------|-------------|----------------------|--------------|-------|----------|----------|--------------------|-------|----------|----------|---------------|--------------|---------------|
|                                                                                                                    | No. Absent            | No. Present | meanCountsInPresents | Estimate     | s.e.  | T value  | P value  | Estimate           | s.e.  | T value  | P value  | Meta Z value  | Meta P value |               |
| 193129;k_Bacteria;p_Firmicutes;c_Clostridia;o_Clostridiales                                                        | 177                   | 716         | 29.21927374          | 0.018331026  | 0.032 | 0.564057 | 0.57286  | 0.03984            | 0.007 | 5.8651   | 6.88E-09 | 4.4956        | 6.94E-06     | 6.88E-09      |
| 295743;k_Bacteria;p_Firmicutes;c_Clostridia;o_Clostridiales;f_Ruminococcales                                       | 507                   | 386         | 37.8626943           | 0.122685905  | 0.026 | 4.733554 | 2.57E-06 | 0.02005            | 0.009 | 2.35404  | 0.019076 | 4.9828        | 6.27E-07     | 6.27E-07      |
| 175962;k_Bacteria;p_Firmicutes;c_Clostridia;o_Clostridiales;f_Ruminococcales                                       | 814                   | 79          | 6.658227848          | 0.223957556  | 0.045 | 4.985222 | 7.44E-07 | -0.0303            | 0.03  | -1.00598 | 0.317662 | 2.7932        | 0.0052188    | 7.44E-07      |
| 113051;k_Bacteria;p_Firmicutes;c_Clostridia;o_Clostridiales;f_Mgibacteriaceae(Clostridiales)                       | 508                   | 385         | 4.314285714          | -0.12083975  | 0.026 | -4.65974 | 3.65E-06 | 0.01236            | 0.015 | 0.83048  | 0.406791 | -2.688        | 0.0071978    | 3.65E-06      |
| 4368791;k_Bacteria;p_Firmicutes;c_Clostridia;o_Clostridiales                                                       | 521                   | 372         | 18.87634409          | 0.118317674  | 0.026 | 4.524347 | 6.88E-06 | 0.02053            | 0.011 | 1.83527  | 0.067273 | 4.474         | 7.68E-06     | 6.88E-06      |
| 337551;k_Bacteria;p_Firmicutes;c_Clostridia;o_Clostridiales;f_Lachnospiraceae                                      | 410                   | 483         | 9.472049689          | 0.116365873  | 0.026 | 4.498691 | 7.75E-06 | -0.0005            | 0.012 | -0.03848 | 0.96932  | 3.1351        | 0.0017182    | 7.75E-06      |
| 584417;k_Bacteria;p_Firmicutes;c_Clostridia;o_Clostridiales                                                        | 466                   | 427         | 29.37470726          | 0.097383288  | 0.026 | 3.78927  | 0.00016  | 0.02068            | 0.009 | 2.41863  | 0.016    | 4.3713        | 1.24E-05     | 1.24E-05      |
| 4437359;k_Bacteria;p_Firmicutes;c_Clostridia;o_Clostridiales                                                       | 240                   | 653         | 16.13782542          | 0.096066021  | 0.029 | 3.325076 | 0.00092  | 0.02543            | 0.009 | 2.87733  | 0.004143 | 4.3706        | 1.24E-05     | 1.24E-05      |
| 317749;k_Bacteria;p_Firmicutes;c_Clostridia;o_Clostridiales                                                        | 543                   | 350         | 5.908571429          | 0.11175989   | 0.026 | 4.269655 | 2.17E-05 | 0.0271             | 0.015 | 1.83592  | 0.067228 | 4.297         | 1.73E-05     | 1.73E-05      |
| 42458;k_Bacteria;p_Firmicutes;c_Clostridia;o_Clostridiales;f_Ruminococcales                                        | 693                   | 200         | 3.59                 | 0.070718932  | 0.031 | 2.286521 | 0.02346  | 0.08481            | 0.023 | 3.6213   | 0.000374 | 4.1299        | 3.63E-05     | 3.63E-05      |
| 173927;k_Bacteria;p_Firmicutes;c_Clostridia;o_Clostridiales                                                        | 535                   | 358         | 4.695530726          | 0.106889805  | 0.026 | 4.088196 | 4.74E-05 | -0.009             | 0.016 | -0.55498 | 0.579258 | 2.4844        | 0.0129752    | 4.74E-05      |
| 2251911;k_Bacteria;p_Actinobacteria;c_Coribacteriales;o_Coribacteriales;f_Coribacteriaceae;f_Eggerthella           | 435                   | 458         | 16.80786026          | -0.079963225 | 0.026 | -3.10686 | 0.00195  | -0.0218            | 0.008 | -2.57326 | 0.010392 | -4.002        | 6.27E-05     | 6.27E-05      |
| 183187;k_Bacteria;p_Firmicutes;c_Clostridia;o_Clostridiales;f_Ruminococcales                                       | 442                   | 451         | 8.490022173          | 0.082655619  | 0.026 | 3.220094 | 0.00132  | 0.03198            | 0.013 | 2.40295  | 0.01667  | 3.9639        | 7.37E-05     | 7.37E-05      |
| 4299281;k_Bacteria;p_Firmicutes;c_Clostridia;o_Clostridiales                                                       | 478                   | 415         | 29.39036145          | 0.101014626  | 0.026 | 3.93547  | 8.95E-05 | 0.00372            | 0.009 | 0.39325  | 0.694338 | 3.0479        | 0.0023047    | 8.95E-05      |
| 4329572;k_Bacteria;p_Firmicutes;c_Clostridia;o_Clostridiales                                                       | 659                   | 234         | 2.525641026          | 0.113346572  | 0.029 | 3.898278 | 0.0001   | 0.03632            | 0.026 | 1.37324  | 0.171015 | 3.712         | 0.0002056    | 0.0001042     |
| 334023;k_Bacteria;p_Firmicutes;c_Clostridia;o_Clostridiales                                                        | 858                   | 35          | 35.82857143          | 0.153900681  | 0.066 | 2.318709 | 0.02064  | 0.1176             | 0.034 | 3.41094  | 0.001818 | 3.8418        | 0.0001222    | 0.0001222     |
| 289562;k_Bacteria;p_Firmicutes;c_Clostridia;o_Clostridiales;f_Ruminococcales                                       | 833                   | 60          | 11.25                | 0.196011066  | 0.051 | 3.823676 | 0.00014  | 0.02262            | 0.031 | 0.72944  | 0.468772 | 3.2042        | 0.0013542    | 0.0001407     |
| 1144764;k_Bacteria;p_Tenericutes;c_Mollicutes;o_RF39                                                               | 819                   | 74          | 30.16216216          | 0.164267233  | 0.047 | 3.529651 | 0.00044  | 0.03784            | 0.021 | 1.8125   | 0.074197 | 3.7489        | 0.0001776    | 0.0001776     |
| 179664;k_Bacteria;p_Firmicutes;c_Clostridia;o_Clostridiales                                                        | 282                   | 611         | 119.8772504          | 0.066338916  | 0.028 | 2.395923 | 0.01678  | 0.0174             | 0.006 | 2.89692  | 0.003904 | 3.7315        | 0.0001903    | 0.0001903     |
| 278483;k_Bacteria;p_Firmicutes;c_Clostridia;o_Clostridiales;f_Mgibacteriaceae(Clostridiales;f_Lachnospiraceae)     | 341                   | 552         | 6.128623188          | 0.090648156  | 0.026 | 3.43529  | 0.00062  | 0.0214             | 0.012 | 1.77002  | 0.077281 | 3.6697        | 0.0002429    | 0.0002429     |
| 192741;k_Bacteria;p_Firmicutes;c_Clostridia;o_Clostridiales                                                        | 475                   | 418         | 6.990430622          | 0.075201731  | 0.026 | 2.914949 | 0.00365  | 0.02744            | 0.013 | 2.19181  | 0.028949 | 3.6001        | 0.000318     | 0.000318      |
| 183845;k_Bacteria;p_Firmicutes;c_Clostridia;o_Clostridiales;f_Ruminococcales;f_Lachnospiraceae                     | 651                   | 242         | 4.842975207          | 0.103503442  | 0.029 | 3.578355 | 0.00036  | 0.01852            | 0.021 | 0.87148  | 0.384373 | 3.1356        | 0.001715     | 0.0003645     |
| 581201;k_Bacteria;p_Firmicutes;c_Clostridia;o_Clostridiales;f_Ruminococcales                                       | 706                   | 187         | 2.550802139          | 0.112899977  | 0.032 | 3.571211 | 0.00037  | -0.0318            | 0.029 | -1.09585 | 0.274583 | 1.743         | 0.0813406    | 0.0003744     |
| 182031;k_Bacteria;p_Firmicutes;c_Clostridia;o_Clostridiales                                                        | 94                    | 799         | 210.9148936          | 0.079620105  | 0.042 | 1.888973 | 0.05922  | 0.01438            | 0.005 | 3.08755  | 0.002088 | 3.51          | 0.000448     | 0.000448      |
| 44502124;k_Bacteria;p_Firmicutes;c_Bacillo_Lactobacillales;f_Streptococcales;f_Streptococcus                       | 600                   | 293         | 4.436860968          | -0.073469638 | 0.027 | -2.68752 | 0.00733  | -0.0353            | 0.015 | -2.28411 | 0.023093 | -3.502        | 0.000461     | 0.000461      |
| 178759;k_Bacteria;p_Tenericutes;c_RF3_o_ML6151-28                                                                  | 813                   | 80          | 4.85                 | 0.140080873  | 0.045 | 3.109324 | 0.00193  | 0.0629             | 0.034 | 1.86792  | 0.065628 | 3.4938        | 0.0004762    | 0.0004762     |
| 307180;k_Bacteria;p_Firmicutes;c_Clostridia;o_Clostridiales                                                        | 813                   | 80          | 3.3375               | 0.143205532  | 0.045 | 3.188739 | 0.00148  | 0.06731            | 0.038 | 1.77308  | 0.080222 | 3.4847        | 0.0004926    | 0.0004926     |
| 34413;k_Bacteria;p_Firmicutes;c_Clostridia;o_Clostridiales;f_Lachnospiraceae                                       | 198                   | 695         | 6.509352518          | 0.106717445  | 0.031 | 3.466451 | 0.00055  | -0.0021            | 0.013 | -0.16834 | 0.866366 | 2.3232        | 0.0201661    | 0.0005527     |
| 13997;k_Bacteria;p_Firmicutes;c_Clostridia;o_Clostridiales;f_Lachnospiraceae;g_Blaustia                            | 767                   | 126         | 8.396825397          | -0.115002791 | 0.037 | -3.12404 | 0.00184  | -0.0324            | 0.018 | -1.781   | 0.077402 | -3.451        | 0.0005583    | 0.0005583     |
| 2631109;k_Bacteria;p_Firmicutes;c_Clostridia;o_Clostridiales;f_Ruminococcales                                      | 410                   | 483         | 24.79917184          | 0.088650446  | 0.026 | 3.43626  | 0.00062  | 0.00853            | 0.01  | 0.87183  | 0.383736 | 3.037         | 0.0023893    | 0.0006172     |
| 334864;k_Bacteria;p_Firmicutes;c_Clostridia;o_Clostridiales                                                        | 832                   | 61          | 8.901639344          | 0.174417751  | 0.051 | 3.430814 | 0.00063  | 0.02239            | 0.031 | 0.7263   | 0.47063  | 2.9274        | 0.0034177    | 0.0006295     |
| 590980;k_Bacteria;p_Firmicutes;c_Clostridia;o_Clostridiales                                                        | 692                   | 201         | 3.417910448          | 0.105153609  | 0.031 | 3.428499 | 0.00063  | 0.02507            | 0.025 | 1.01158  | 0.312978 | 3.1291        | 0.0017532    | 0.0006348     |
| 295100;k_Bacteria;p_Firmicutes;c_Clostridia;o_Clostridiales;f_Christensenellaceae                                  | 675                   | 218         | 9.247706422          | 0.102173935  | 0.03  | 3.412629 | 0.00067  | 0.01186            | 0.016 | 0.73475  | 0.463298 | 2.9232        | 0.0034649    | 0.0006725     |
| 1177803;k_Bacteria;p_Firmicutes;c_Clostridia;o_Clostridiales;f_Phytothecococcales;f_Mgibacteriaceae(Clostridiales) | 655                   | 238         | 4.714285714          | 0.072363682  | 0.029 | 2.475191 | 0.0135   | 0.04241            | 0.018 | 2.33196  | 0.020552 | 3.3845        | 0.0007132    | 0.0007132     |

# Online Table V. Associated Taxonomies at FDR < 0.05 level.

## A. Association with BMI

| No | Taxonomy                                                                                           | Summary of OTUs reads |             |               | Binary Model |       |          |           | Quantitative model |         |           |         | Meta Analysis |              | Asso. Z value    | Asso. P value   | Replication in Goodrich et al Cell 2014 |             |           |                              |
|----|----------------------------------------------------------------------------------------------------|-----------------------|-------------|---------------|--------------|-------|----------|-----------|--------------------|---------|-----------|---------|---------------|--------------|------------------|-----------------|-----------------------------------------|-------------|-----------|------------------------------|
|    |                                                                                                    | No. Absent            | No. Present | mean/Counting | Estimate     | s.e.  | T value  | P value   | Estimate           | s.e.    | T value   | P value | Meta Z value  | Meta P value |                  |                 | BMI p-value                             | BMI q-value | higher in | Replicated (same direction)? |
| 1  | k__Archaea                                                                                         | 388                   | 505         | 358.73267     | 0.55549      | 0.275 | -2.01832 | 0.0488576 | 0.142              | 0.05132 | -2.667059 | 0.0079  | 3.303         | 0.000955     | <b>-3.30445</b>  | <b>0.000955</b> | 0.01111                                 | 0.0090523   | Lean      | yes                          |
| 2  | k__Bacteria__Actinobacteria__Coriobacteriia__Coriobacteriales__Coriobacterium__Coriobacterium      | 623                   | 70          | 22.8          | 0.65224      | 0.5   | 1.30461  | 0.1923625 | 0.144              | 0.22461 | 0.509454  | 0.6121  | 1.2803        | 0.200431     | 1.303623         | 0.192363        | na                                      | na          | na        | na                           |
| 3  | k__Bacteria__Actinobacteria__Coriobacteriia__Coriobacteriales__Coriobacterium__Aggrius             | 435                   | 458         | 16.80786      | 0.36538      | 0.27  | 1.35266  | 0.1765096 | 0.1817             | 0.0934  | 1.945107  | 0.0524  | 2.3275        | 0.0199386    | 2.527502         | 0.019939        | 0.03094                                 | 0.0489024   | Obese     | na                           |
| 4  | k__Bacteria__Bacteroidetes__Bacteroidia__Bacteroidales                                             | 2                     | 891         | 1100.3726     | 0            | 0     | 0        | 1         | -0.211             | 0.07675 | -2.743257 | 0.0062  | -1.935        | 0.0529738    | -2.73669         | 0.006206        | 0.96374                                 | 0.9659907   | Lean      | na                           |
| 5  | k__Bacteria__Bacteroidetes__Bacteroidia__Bacteroidales__Bacteroidia__Bacteroides                   | 5                     | 888         | 407.75563     | 0            | 0     | 0        | 1         | -0.09              | 0.06543 | -1.374341 | 0.1697  | 0.971         | 0.3315418    | -1.37322         | 0.169684        | 0.25619                                 | 0.452895    | Obese     | na                           |
| 6  | k__Bacteria__Bacteroidetes__Bacteroidia__Bacteroidales__Bacteroidia__Bifidobacteriales             | 34                    | 859         | 110.97206     | 1.22304      | 0.702 | -1.74289 | 0.0816977 | 0.184              | 0.06634 | -2.771448 | 0.0057  | 3.186         | 0.0014337    | <b>-3.18577</b>  | <b>0.001444</b> | na                                      | na          | na        | na                           |
| 8  | k__Bacteria__Bacteroidetes__Bacteroidia__Bacteroidales__Bacteroidia__Oribacteriales                | 219                   | 674         | 10.047478     | 0.70765      | 0.312 | -2.26976 | 0.0234606 | 0.281              | 0.09376 | -2.993717 | 0.0029  | 3.711         | 0.0002062    | <b>-3.71126</b>  | <b>0.000206</b> | 0.09847                                 | 0.2501123   | Lean      | na                           |
| 9  | k__Bacteria__Bacteroidetes__Bacteroidia__Bacteroidales__Oribacteriales__Bacteroides                | 410                   | 483         | 7.132594      | 0.70155      | 0.269 | -2.60651 | 0.0093    | 0.203              | 0.11963 | -1.788543 | 0.0743  | -3.101        | 0.0019288    | <b>-3.10099</b>  | <b>0.001929</b> | 0.01111                                 | 0.0487732   | Lean      | yes                          |
| 10 | k__Bacteria__Bacteroidetes__Bacteroidia__Bacteroidales__Oribacteriales__Oribacterium               | 316                   | 577         | 5.7712305     | -0.7628      | 0.281 | -2.71656 | 0.0067245 | -0.213             | 0.11305 | -1.887461 | 0.0596  | 3.248         | 0.0016006    | <b>-3.24838</b>  | <b>0.001601</b> | 0.4991                                  | 0.6787126   | Lean      | no                           |
| 11 | k__Bacteria__Bacteroidetes__Bacteroidia__Bacteroidales__Bifidobacteriales                          | 125                   | 768         | 39.302083     | -1.96141     | 0.382 | -5.13159 | 3.53E-07  | -0.123             | 0.06672 | -1.8435   | 0.0656  | 4.903         | 9.45E-07     | <b>-5.09276</b>  | <b>3.53E-07</b> | 0.00042                                 | 0.0048162   | Lean      | no                           |
| 12 | k__Bacteria__Bacteroidetes__Bacteroidia__Bacteroidales__S24.7                                      | 658                   | 235         | 104           | -0.13883     | 0.311 | -0.44679 | 0.6551338 | 0.0053             | 0.0895  | 0.058857  | 0.9531  | 0.274         | 0.7838023    | 0.46664          | 0.655134        | na                                      | na          | na        | na                           |
| 6  | k__Bacteria__Bacteroidetes__Bacteroidia__Bacteroidales__S24.7__Bifidobacteriales                   | 169                   | 724         | 32.164365     | 1.38817      | 0.34  | -0.08314 | 4.84E-05  | 0.0261             | 0.0739  | 0.353089  | 0.7241  | 2.623         | 0.0087048    | <b>-4.06305</b>  | <b>4.84E-05</b> | na                                      | na          | na        | na                           |
| 13 | k__Bacteria__Cyanobacteria                                                                         | 429                   | 464         | 12.336207     | 0.83649      | 0.269 | -3.11308 | 0.0019107 | 0.02               | 0.09551 | -0.201665 | 0.8403  | 2.337         | 0.0194278    | <b>-3.10378</b>  | <b>0.001911</b> | 0.08209                                 | 0.1999995   | Lean      | na                           |
| 14 | k__Bacteria__Firmicutes__Bacilli__Gemmatimonadetes__Bacillales                                     | 524                   | 369         | 2.9691599     | 0.86606      | 0.272 | -3.18725 | 0.0014865 | 0.1332             | 0.20317 | 0.655495  | 0.5126  | 2.7097        | 0.0067335    | <b>-3.177304</b> | <b>0.001487</b> | na                                      | na          | na        | na                           |
| 18 | k__Bacteria__Firmicutes__Clostridia__Clostridiales__Christensenellales                             | 232                   | 661         | 38.255673     | -1.15395     | 0.308 | -3.74953 | 0.0001886 | -0.221             | 0.06884 | -3.203697 | 0.0014  | 4.896         | 9.79E-07     | <b>-4.89591</b>  | <b>9.79E-07</b> | 1.4E-05                                 | 0.001262    | Lean      | yes                          |
| 19 | k__Bacteria__Firmicutes__Clostridia__Clostridiales__Clostridiales                                  | 84                    | 809         | 11.820766     | 1.97282      | 0.459 | -4.29898 | 1.91E-05  | 0.144              | 0.09265 | -1.551265 | 0.1212  | 4.119         | 3.80E-05     | <b>-4.27669</b>  | <b>1.91E-05</b> | 0.03398                                 | 0.109537    | Lean      | yes                          |
| 20 | k__Bacteria__Firmicutes__Clostridia__Clostridiales__Clostridiales__O2006                           | 399                   | 494         | 6.194332      | 0.63374      | 0.273 | -2.32201 | 0.0204576 | 0.096              | 0.11774 | 0.815897  | 0.4127  | 1.06          | 0.289279     | -2.31785         | 0.020458        | 0.02320                                 | 0.0870564   | Lean      | na                           |
| 16 | k__Bacteria__Firmicutes__Clostridia__Clostridiales__Clostridiales__Lachnospiraceae                 | 841                   | 52          | 26.480769     | 0.82703      | 0.577 | 1.43435  | 0.1518249 | 0.158              | 0.29305 | -0.539179 | 0.5923  | 0.6347        | 0.5256501    | 1.433115         | 0.151825        | na                                      | na          | na        | na                           |
| 21 | k__Bacteria__Firmicutes__Clostridia__Clostridiales__Dehalobacteriaceae__Dehalobacterium            | 612                   | 281         | 2.8398577     | 0.92868      | 0.288 | -3.21917 | 0.0013322 | 0.2352             | 0.1993  | 1.180252  | 0.2389  | 1.436         | 0.1509167    | <b>-3.20895</b>  | <b>0.001332</b> | 1.2E-05                                 | 0.0013899   | Lean      | yes                          |
| 22 | k__Bacteria__Firmicutes__Clostridia__Clostridiales__Lachnospiraceae                                | 1                     | 892         | 162.47534     | 0            | 0     | 0        | 1         | 0.5962             | 0.16716 | 3.566374  | 0.0004  | 2.5121        | 0.0120001    | <b>-3.552703</b> | <b>0.000381</b> | 0.00384                                 | 0.0224942   | Obese     | yes                          |
| 23 | k__Bacteria__Firmicutes__Clostridia__Clostridiales__Lachnospiraceae__Blautia                       | 51                    | 842         | 8.965057      | 0.83747      | 0.579 | 1.44625  | 0.1484588 | 0.2827             | 0.10553 | 2.679315  | 0.0075  | 2.9117        | 0.0039944    | <b>-2.911726</b> | <b>0.003994</b> | 0.01068                                 | 0.0478067   | Obese     | yes                          |
| 14 | k__Bacteria__Firmicutes__Clostridia__Clostridiales__Lachnospiraceae__Coprococcus                   | 414                   | 479         | 6.565762      | 0.28385      | 0.274 | -1.03594 | 0.3005114 | -0.108             | 0.1313  | -0.8237   | 0.4105  | 1.314         | 0.1888383    | -1.31402         | 0.188838        | 0.06599                                 | 0.1728847   | Obese     | na                           |
| 25 | k__Bacteria__Firmicutes__Clostridia__Clostridiales__Lachnospiraceae__Lachnospira                   | 181                   | 712         | 24.563202     | -0.74132     | 0.334 | -2.21794 | 0.026811  | 0.0748             | 0.07709 | 0.970723  | 0.332   | 0.88          | 0.3789766    | -2.21426         | 0.026811        | 1.8E-05                                 | 0.000463    | Lean      | na                           |
| 15 | k__Bacteria__Firmicutes__Clostridia__Clostridiales__Moryella__Moryella__Lachnospiraceae            | 341                   | 552         | 6.1286232     | -0.75558     | 0.276 | -2.73381 | 0.006385  | -0.176             | 0.12198 | -1.442962 | 0.1496  | 2.947         | 0.0032045    | <b>-2.94741</b>  | <b>0.003205</b> | na                                      | na          | na        | na                           |
| 17 | k__Bacteria__Firmicutes__Clostridia__Clostridiales__Moryella__Moryella__Lachnospiraceae            | 655                   | 238         | 4.7142857     | -0.97996     | 0.305 | -3.21463 | 0.0013532 | -0.064             | 0.16365 | -0.391057 | 0.6961  | 2.542         | 0.01102      | <b>-3.20445</b>  | <b>0.001353</b> | na                                      | na          | na        | na                           |
| 26 | k__Bacteria__Firmicutes__Euryarchaeota__Euryarchaeota__Euryarchaeota__Euryarchaeota__Euryarchaeota | 303                   | 590         | 13.142373     | 0.81877      | 0.283 | -2.89079 | 0.0039363 | -0.106             | 0.0928  | -1.141882 | 0.2541  | 2.845         | 0.0044377    | <b>-2.88322</b>  | <b>0.003936</b> | 0.03923                                 | 0.1202065   | Lean      | yes                          |
| 27 | k__Bacteria__Firmicutes__Euryarchaeota__Euryarchaeota__Euryarchaeota__Euryarchaeota__Euryarchaeota | 312                   | 581         | 3.0791738     | 0.61668      | 0.282 | -2.18677 | 0.0289532 | -0.095             | 0.14963 | -0.631966 | 0.5277  | 1.0978        | 0.2728668    | -2.184123        | 0.028953        | 0.72728                                 | 0.8903074   | Obese     | na                           |
| 28 | k__Bacteria__Proteobacteria__Betaproteobacteria__Burkholderiales__Hofmanniellales                  | 574                   | 319         | 4.462815      | -1.13397     | 0.279 | -4.06053 | 3.33E-05  | 0.266              | 0.15556 | -1.708398 | 0.0885  | 4.062         | 4.88E-05     | <b>-4.06513</b>  | <b>4.88E-05</b> | na                                      | na          | na        | na                           |
| 30 | k__Bacteria__Proteobacteria__Betaproteobacteria__Oribacteriales__Oribacteriales__Oribacterium      | 194                   | 699         | 25.858369     | 0.96695      | 0.325 | -2.97563 | 0.0030003 | -0.002             | 0.07532 | -0.021299 | 0.983   | 2.113         | 0.0345712    | <b>-2.96743</b>  | <b>0.003003</b> | 0.73611                                 | 0.8667375   | Obese     | na                           |
| 29 | k__Bacteria__Proteobacteria__Betaproteobacteria__Oribacteriales__Oribacteriales__Oribacterium      | 309                   | 584         | 11.383562     | -0.90382     | 0.283 | -3.18835 | 0.0014809 | -0.01              | 0.09419 | -0.111219 | 0.9116  | 2.326         | 0.0200178    | <b>-3.1784</b>   | <b>0.001481</b> | 0.12497                                 | 0.2597026   | Obese     | na                           |
| 31 | k__Bacteria__Proteobacteria__Gammaproteobacteria                                                   | 467                   | 426         | 36.5          | -0.32004     | 0.269 | -1.1878  | 0.2352283 | 0.0747             | 0.08862 | 0.841296  | 0.3995  | 0.244         | 0.8075108    | -1.187           | 0.235228        | 0.87708                                 | 0.9457519   | Obese     | na                           |
| 32 | k__Bacteria__Proteobacteria__Gammaproteobacteria__Pasteurellales__Pasteurellales                   | 538                   | 355         | 15.467606     | 0.44765      | 0.274 | -1.6314  | 0.101161  | 0.1084             | 0.11432 | 0.948472  | 0.3435  | 0.483         | 0.6293654    | -1.62972         | 0.101161        | 0.04855                                 | 0.1138688   | Lean      | na                           |
| 13 | k__Bacteria__Tenericutes                                                                           | 323                   | 570         | 90.261404     | -1.04539     | 0.281 | -3.73863 | 0.0002129 | -0.083             | 0.06531 | -1.272254 | 0.2038  | 3.517         | 0.0004362    | <b>-3.70325</b>  | <b>0.000213</b> | 6.6E-07                                 | 1.532E-05   | Lean      | yes                          |
| 34 | k__Bacteria__Tenericutes__Tenericutes__Tenericutes__Tenericutes__Tenericutes                       | 245                   | 648         | 282.80401     | -0.57871     | 0.304 | -1.90288 | 0.0573794 | -0.147             | 0.04887 | -3.009647 | 0.0027  | 3.464         | 0.0005328    | <b>-3.46369</b>  | <b>0.000533</b> | 0.03277                                 | 0.101414    | Lean      | yes                          |

## B. Association with TG

| No | Taxonomy        | Summary of OTUs reads |            |                     | Association with TG |             |           |          |                    |         |           |               |              |               |                  |                 |
|----|-----------------|-----------------------|------------|---------------------|---------------------|-------------|-----------|----------|--------------------|---------|-----------|---------------|--------------|---------------|------------------|-----------------|
|    |                 |                       |            |                     | Binary Model        |             |           |          | Quantitative model |         |           | Meta Analysis |              | Asso. Z value | Asso. P value    |                 |
|    |                 | No. Absent            | No Present | meanCounts/Presents | Estimate            | s.e.        | T value   | P value  | Estimate           | s.e.    | T value   | P value       | Meta Z value |               |                  | Meta P value    |
| 1  | k_Archaea       | 388                   | 505        | 358.7326733         | -0.031873486        | 0.04970027  | -0.641314 | 0.521484 | -0.031034          | 0.01005 | -3.087107 | 0.0021333     | -2.62483     | 0.00866918    | <b>-3.071013</b> | <b>0.002133</b> |
| 2  | k_Bacteriophyta | 823                   | 70         | 22.8                | 0.239065921         | 0.089767865 | 2.663157  | 0.007881 | 0.087195           | 0.03879 | 2.247853  | 0.0279322     | 3.433252     | 0.00059639    | <b>3.433252</b>  | <b>0.000596</b> |
| 3  | k_Bacteriophyta | 435                   | 458        | 16.80786026         | 0.198117942         | 0.04825651  | 4.1055174 | 4.41E-05 | 0.029459           | 0.01712 | 1.720466  | 0.0860306     | 4.102494     | 4.09E-05      | <b>4.102494</b>  | <b>4.09E-05</b> |
| 4  | k_Bacteriophyta | 2                     | 891        | 1100.372615         | 0                   | 0           | 0         | 1        | -0.063453          | 0.01366 | -4.64663  | 3.89E-06      | -3.26499     | 0.00109469    | <b>-4.617389</b> | <b>3.89E-06</b> |
| 5  | k_Bacteriophyta | 34                    | 859        | 110.9720605         | -0.233515756        | 0.128155448 | -1.822129 | 0.068772 | -0.031233          | 0.01206 | -2.590027 | 0.0097602     | -3.11419     | 0.00184451    | <b>-3.11419</b>  | <b>0.001845</b> |
| 6  | k_Bacteriophyta | 169                   | 724        | 32.16436464         | -0.222027892        | 0.061491765 | -3.610693 | 0.000322 | -0.002757          | 0.0132  | -0.208848 | 0.8346261     | -2.69076     | 0.007129      | <b>-3.596534</b> | <b>0.000322</b> |
| 7  | k_Bacteriophyta | 5                     | 888        | 407.7556306         | 0                   | 0           | 0         | 1        | -0.035561          | 0.01172 | -3.033716 | 0.0024863     | -2.139       | 0.03243586    | <b>-3.024999</b> | <b>0.002486</b> |
| 8  | k_Bacteriophyta | 219                   | 674        | 10.04747774         | -0.173269955        | 0.056016681 | -3.093185 | 0.002042 | -0.053708          | 0.01703 | -3.153657 | 0.0016845     | -4.40166     | 1.07E-05      | <b>-4.401663</b> | <b>1.07E-05</b> |
| 9  | k_Bacteriophyta | 410                   | 483        | 7.126293996         | -0.182801929        | 0.048294166 | -3.785176 | 0.000164 | -0.055813          | 0.02053 | -2.718839 | 0.0067894     | -4.57921     | 4.67E-06      | <b>-4.57921</b>  | <b>4.67E-06</b> |
| 10 | k_Bacteriophyta | 316                   | 577        | 5.771230503         | -0.153492833        | 0.050525733 | -3.037914 | 0.002452 | -0.030771          | 0.02027 | -1.518288 | 0.1294942     | -3.21402     | 0.0013089     | <b>-3.214021</b> | <b>0.001309</b> |
| 11 | k_Bacteriophyta | 125                   | 768        | 39.30208333         | -0.23249752         | 0.069412471 | -3.349506 | 0.000844 | -0.014161          | 0.01222 | -1.158849 | 0.2468802     | -3.17917     | 0.00147699    | <b>-3.33806</b>  | <b>0.000844</b> |
| 12 | k_Bacteriophyta | 658                   | 235        | 104                 | -0.145474903        | 0.055750961 | -2.60937  | 0.009224 | -0.032007          | 0.01656 | -1.823798 | 0.0694747     | -3.12469     | 0.00177994    | <b>-3.124688</b> | <b>0.001779</b> |
| 13 | k_Bacteriophyta | 429                   | 464        | 12.3362069          | -0.138333805        | 0.048455185 | -2.854881 | 0.004406 | 0.007312           | 0.01838 | 0.397871  | 0.6909099     | -1.73237     | 0.08320769    | <b>-2.847562</b> | <b>0.004406</b> |
| 14 | k_Bacteriophyta | 524                   | 369        | 2.989159892         | 0.068459431         | 0.049179484 | 1.3920323 | 0.164261 | 0.127423           | 0.03506 | 3.634305  | 0.0003187     | 3.528802     | 0.00041745    | <b>3.599597</b>  | <b>0.000319</b> |
| 15 | k_Bacteriophyta | 341                   | 552        | 6.128623188         | -0.142927333        | 0.049771082 | -2.871694 | 0.004418 | -0.020779          | 0.02174 | -0.955723 | 0.3396342     | -2.70054     | 0.00692266    | <b>-2.864255</b> | <b>0.004418</b> |
| 16 | k_Bacteriophyta | 841                   | 52         | 26.48076923         | 0.019646294         | 0.103952459 | 0.1889931 | 0.850141 | -0.050124          | 0.041   | -1.222448 | 0.2275071     | -0.71974     | 0.47168448    | <b>-1.206805</b> | <b>0.227507</b> |
| 17 | k_Bacteriophyta | 655                   | 238        | 4.714285714         | -0.018680005        | 0.055220341 | -0.33839  | 0.735149 | -0.04216           | 0.03271 | -1.288963 | 0.1986339     | -1.14805     | 0.25094614    | <b>-1.28531</b>  | <b>0.198684</b> |
| 18 | k_Bacteriophyta | 232                   | 661        | 38.25567322         | -0.207634965        | 0.055510036 | -3.740494 | 0.000195 | -0.028444          | 0.01238 | -2.2973   | 0.0219152     | -4.25443     | 2.10E-05      | <b>-4.254429</b> | <b>2.10E-05</b> |
| 19 | k_Bacteriophyta | 84                    | 809        | 11.82076638         | -0.089573123        | 0.083857894 | -1.068154 | 0.285741 | -0.029917          | 0.01699 | -1.760686 | 0.0786712     | -1.99825     | 0.04568906    | <b>-1.998255</b> | <b>0.045689</b> |
| 20 | k_Bacteriophyta | 399                   | 494        | 6.194331984         | -0.138746841        | 0.04909921  | -2.825847 | 0.004821 | -0.028931          | 0.02182 | -1.325821 | 0.1855168     | -2.92932     | 0.003397      | <b>-2.929324</b> | <b>0.003397</b> |
| 21 | k_Bacteriophyta | 612                   | 281        | 2.839857651         | -0.049643503        | 0.052238925 | -0.950316 | 0.342211 | 0.047951           | 0.04026 | 1.191024  | 0.2346639     | 0.168732     | 0.8660757     | <b>1.18843</b>   | <b>0.234664</b> |
| 22 | k_Bacteriophyta | 1                     | 892        | 162.4753363         | 0                   | 0           | 0         | 1        | 0.076232           | 0.03025 | 2.519944  | 0.0119119     | 1.778192     | 0.07537238    | <b>2.514743</b>  | <b>0.011912</b> |
| 23 | k_Bacteriophyta | 51                    | 842        | 8.956057007         | 0.174056271         | 0.104240734 | 1.6697529 | 0.095321 | 0.067328           | 0.01896 | 3.551936  | 0.0004038     | 3.6809       | 0.00023241    | <b>3.6809</b>    | <b>0.000232</b> |
| 24 | k_Bacteriophyta | 414                   | 479        | 6.565762004         | -0.200419653        | 0.048957273 | -4.093767 | 4.63E-05 | -0.016482          | 0.02314 | -0.712148 | 0.4762735     | -3.38357     | 0.00071551    | <b>-4.073501</b> | <b>4.63E-05</b> |
| 25 | k_Bacteriophyta | 181                   | 712        | 24.56320225         | -0.256516089        | 0.059751151 | -4.293074 | 1.96E-05 | -0.017697          | 0.01317 | -1.343248 | 0.1796229     | -3.96811     | 7.24E-05      | <b>-4.269845</b> | <b>1.96E-05</b> |
| 26 | k_Bacteriophyta | 303                   | 590        | 13.14237288         | -0.018201919        | 0.051303452 | -0.354789 | 0.722832 | -0.003904          | 0.0171  | -0.228289 | 0.8195013     | -0.41215     | 0.68023193    | <b>-0.412147</b> | <b>0.680232</b> |
| 27 | k_Bacteriophyta | 312                   | 581        | 3.079173838         | 0.139203541         | 0.050703606 | 2.7454367 | 0.006165 | 0.04176            | 0.02843 | 1.469119  | 0.1423466     | 2.974074     | 0.00239875    | <b>2.974074</b>  | <b>0.002399</b> |
| 28 | k_Bacteriophyta | 574                   | 319        | 4.460815047         | -0.157246343        | 0.05049469  | -3.114116 | 0.001904 | -0.055273          | 0.03041 | -1.817483 | 0.0700931     | -3.47621     | 0.00050856    | <b>-3.476207</b> | <b>0.000509</b> |
| 29 | k_Bacteriophyta | 194                   | 699        | 25.8583691          | -0.090380776        | 0.058741052 | -1.538631 | 0.124251 | -0.015322          | 0.01392 | -1.101052 | 0.271256      | -1.86489     | 0.06219723    | <b>-1.864887</b> | <b>0.062197</b> |
| 30 | k_Bacteriophyta | 309                   | 584        | 11.38356164         | -0.0111639          | 0.051346578 | -0.256373 | 0.797722 | -0.009998          | 0.01786 | -0.559699 | 0.5759013     | -0.57677     | 0.56409377    | <b>-0.576772</b> | <b>0.564094</b> |
| 31 | k_Bacteriophyta | 467                   | 426        | 36.5                | -0.153559956        | 0.048315151 | -3.178298 | 0.001533 | -0.029222          | 0.014   | -2.087271 | 0.0374645     | -3.71167     | 0.0002059     | <b>-3.711667</b> | <b>0.000206</b> |
| 32 | k_Bacteriophyta | 538                   | 355        | 15.46760563         | -0.197553312        | 0.049081246 | -4.025026 | 6.18E-05 | -0.024457          | 0.01674 | -1.460777 | 0.1449738     | -3.86309     | 0.00011196    | <b>-4.005721</b> | <b>6.18E-05</b> |
| 33 | k_Bacteriophyta | 323                   | 570        | 90.26140351         | -0.260678392        | 0.05028562  | -5.183955 | 2.69E-07 | -0.014884          | 0.01153 | -1.291312 | 0.1971237     | -4.54932     | 5.38E-06      | <b>-5.14392</b>  | <b>2.69E-07</b> |
| 34 | k_Bacteriophyta | 245                   | 648        | 282.8040123         | -0.020267247        | 0.054891488 | -0.369224 | 0.712049 | -0.02419           | 0.00916 | -2.641565 | 0.008453      | -2.1231      | 0.0337451     | <b>-2.633417</b> | <b>0.008453</b> |



### C. Association with HDL

| No | Taxonomy                                                                     | Summary of OTUs reads |             |                  | Association with HDL |        |         |                    |           |        |               |          |               |               |                  |                  |
|----|------------------------------------------------------------------------------|-----------------------|-------------|------------------|----------------------|--------|---------|--------------------|-----------|--------|---------------|----------|---------------|---------------|------------------|------------------|
|    |                                                                              | No. Absent            | No. Present | Count/Prevalence | Binary Model         |        |         | Quantitative model |           |        | Meta Analysis |          | Asso. Z value | Asso. P value |                  |                  |
|    |                                                                              |                       |             |                  | Estimate             | s.e.   | T value | P value            | Estimate  | s.e.   | T value       | P value  |               |               | Meta Z value     | Meta P value     |
| 1  | k__Archaea                                                                   | 388                   | 505         | 358.73267        | 0.029222             | 0.0264 | 1.10731 | 0.2684619          | 0.0085207 | 0.0056 | 1.5168        | 0.129939 | 1.8533        | 0.06384       | 1.8532947        | 0.0638401        |
| 2  | k__Bacteria_p__Actinobacteria_c__Coriobacteriia_o__Coriobacteriales_f__Co    | 823                   | 70          | 22.8             | -0.05037             | 0.0478 | -1.0527 | 0.2927651          | 0.0061629 | 0.0215 | 0.2871        | 0.774972 | -0.542        | 0.587968      | -1.052075        | 0.2927651        |
| 3  | k__Bacteria_p__Actinobacteria_c__Coriobacteriia_o__Coriobacteriales_f__Co    | 435                   | 458         | 16.80786         | -0.07996             | 0.0257 | -3.1069 | 0.001951           | -0.021842 | 0.0085 | -2.5733       | 0.010392 | -4.002        | 6.27E-05      | <b>4.002297</b>  | <b>6.27E-05</b>  |
| 4  | k__Bacteria_p__Bacteroidetes_c__Bacteroidia_o__Bacteroidales                 | 2                     | 891         | 1100.3726        | 0                    | 0      | 0       | 1                  | 0.0176423 | 0.0074 | 2.3951        | 0.016821 | 1.6904        | 0.090949      | 2.3906027        | 0.0168207        |
| 5  | k__Bacteria_p__Bacteroidetes_c__Bacteroidia_o__Bacteroidales_f__Bacteroi     | 34                    | 859         | 110.97206        | 0.039644             | 0.0682 | 0.58134 | 0.5611593          | 0.0032455 | 0.0065 | 0.4983        | 0.618384 | 0.7632        | 0.445372      | 0.763154         | 0.4453716        |
| 6  | k__Bacteria_p__Bacteroidetes_c__Bacteroidia_o__Bacteroidales_f__S24-7/Ba     | 169                   | 724         | 32.164365        | 0.058767             | 0.0328 | 1.78919 | 0.0739247          | -0.012005 | 0.0074 | -1.6142       | 0.106926 | 0.1237        | 0.901566      | 1.7870791        | 0.0739247        |
| 7  | k__Bacteria_p__Bacteroidetes_c__Bacteroidia_o__Bacteroidales_f__Bacteroi     | 5                     | 888         | 407.75563        | 0                    | 0      | 0       | 1                  | 0.0135655 | 0.0063 | 2.1579        | 0.031202 | 1.5235        | 0.127646      | 2.154487         | 0.031202         |
| 8  | k__Bacteria_p__Bacteroidetes_c__Bacteroidia_o__Bacteroidales_f__Odoriba      | 219                   | 674         | 10.047478        | 0.037017             | 0.0299 | 1.23837 | 0.215907           | 0.0198754 | 0.0094 | 2.121         | 0.03429  | 2.3717        | 0.017705      | 2.3717319        | 0.0177049        |
| 9  | k__Bacteria_p__Bacteroidetes_c__Bacteroidia_o__Bacteroidales_f__Odoriba      | 410                   | 483         | 7.126294         | 0.063726             | 0.0258 | 2.47262 | 0.013599           | 0.0112126 | 0.0119 | 0.9446        | 0.345319 | 2.4122        | 0.015856      | 2.4676839        | 0.013599         |
| 10 | k__Bacteria_p__Bacteroidetes_c__Bacteroidia_o__Bacteroidales_f__Odoriba      | 316                   | 577         | 5.7712305        | 0.036532             | 0.027  | 1.35546 | 0.1756157          | 0.0154917 | 0.0113 | 1.3682        | 0.171787 | 1.9239        | 0.054362      | 1.9239399        | 0.0543621        |
| 11 | k__Bacteria_p__Bacteroidetes_c__Bacteroidia_o__Bacteroidales_f__Rikenella    | 125                   | 768         | 39.302083        | 0.056229             | 0.037  | 1.77181 | 0.0767687          | 0.0056321 | 0.0067 | 0.8399        | 0.401215 | 1.845         | 0.06504       | 1.8449854        | 0.0650397        |
| 12 | k__Bacteria_p__Bacteroidetes_c__Bacteroidia_o__Bacteroidales_f__S24-7        | 658                   | 235         | 104              | 0.03023              | 0.0297 | 1.01741 | 0.3092335          | -0.005317 | 0.01   | -0.5306       | 0.596175 | 0.3443        | 0.730616      | 1.0168317        | 0.3092335        |
| 13 | k__Bacteria_p__Cyanobacteria                                                 | 429                   | 464         | 12.336207        | 0.055553             | 0.0258 | 2.15394 | 0.0315133          | 0.0063305 | 0.0098 | 0.6473        | 0.517766 | 1.978         | 0.047928      | 2.1505299        | 0.0315133        |
| 14 | k__Bacteria_p__Firmicutes_c__Bacilli_o__Gemellales/Bacillales                | 524                   | 369         | 2.9891599        | -0.00395             | 0.0262 | -0.1509 | 0.8801077          | -0.03484  | 0.0174 | -2.0041       | 0.045795 | -1.519        | 0.128776      | -1.9972813       | 0.0457946        |
| 15 | k__Bacteria_p__Firmicutes_c__Clostridia_o__Clostridiales_f__Mogibacteriace   | 341                   | 552         | 6.1286232        | 0.090648             | 0.0264 | 3.43529 | 0.0006194          | 0.0213975 | 0.0121 | 1.77          | 0.077281 | 3.6697        | 0.000243      | <b>3.6696563</b> | <b>0.0002429</b> |
| 16 | k__Bacteria_p__Firmicutes_c__Clostridia_o__Clostridiales_f__Clostridiaceae/f | 841                   | 52          | 26.480769        | -0.07073             | 0.0552 | -1.282  | 0.200164           | 0.0236992 | 0.0225 | 1.054         | 0.297177 | -0.169        | 0.866032      | -1.2810846       | 0.200164         |
| 17 | k__Bacteria_p__Firmicutes_c__Clostridia_o__Clostridiales_f__Peptostreptoco   | 655                   | 238         | 4.7142857        | 0.072364             | 0.0292 | 2.47519 | 0.0135022          | 0.0424122 | 0.0182 | 2.332         | 0.020552 | 3.3845        | 0.000713      | <b>3.3844619</b> | <b>0.0007132</b> |
| 18 | k__Bacteria_p__Firmicutes_c__Clostridia_o__Clostridiales_f__Christensenella  | 232                   | 661         | 38.255673        | 0.030382             | 0.0297 | 1.0229  | 0.3066352          | 0.0203002 | 0.0068 | 2.9839        | 0.002951 | 2.8249        | 0.004729      | 2.9727634        | 0.0029513        |
| 19 | k__Bacteria_p__Firmicutes_c__Clostridia_o__Clostridiales_f__Clostridiaceae   | 84                    | 809         | 11.820766        | 0.073237             | 0.0445 | 1.64547 | 0.1002273          | -0.004459 | 0.0092 | -0.4842       | 0.628346 | 0.82          | 0.412199      | 1.6437525        | 0.1002273        |
| 20 | k__Bacteria_p__Firmicutes_c__Clostridia_o__Clostridiales_f__Clostridiaceae   | 399                   | 494         | 6.194332         | 0.068515             | 0.0261 | 2.62522 | 0.0088082          | -0.020476 | 0.0125 | -1.64         | 0.101643 | 0.6947        | 0.487235      | 2.6194105        | 0.0088082        |
| 21 | k__Bacteria_p__Firmicutes_c__Clostridia_o__Clostridiales_f__Dehalobacteria   | 612                   | 281         | 2.8398577        | 0.020734             | 0.0278 | 0.74701 | 0.4552546          | 0.0183758 | 0.0234 | 0.7837        | 0.433891 | 1.0813        | 0.27955       | 1.0813314        | 0.2795497        |
| 22 | k__Bacteria_p__Firmicutes_c__Clostridia_o__Clostridiales_f__Lachnospiraceae  | 1                     | 892         | 162.47534        | 0                    | 0      | 0       | 1                  | -0.006431 | 0.0161 | -0.3987       | 0.690234 | -0.282        | 0.77809       | -0.3985382       | 0.6902335        |
| 23 | k__Bacteria_p__Firmicutes_c__Clostridia_o__Clostridiales_f__Lachnospiraceae  | 51                    | 842         | 8.956057         | -0.03594             | 0.0554 | -0.6482 | 0.5170312          | -0.017523 | 0.01   | -1.7576       | 0.079318 | -1.699        | 0.089233      | -1.755465        | 0.0791798        |
| 24 | k__Bacteria_p__Firmicutes_c__Clostridia_o__Clostridiales_f__Lachnospiraceae  | 414                   | 479         | 6.565762         | 0.069521             | 0.0261 | 2.65877 | 0.0079837          | -0.008081 | 0.0131 | -0.6161       | 0.538117 | 1.4404        | 0.149742      | 2.6527596        | 0.0079837        |
| 25 | k__Bacteria_p__Firmicutes_c__Clostridia_o__Clostridiales_f__Lachnospiraceae  | 181                   | 712         | 24.563202        | 0.037279             | 0.032  | 1.16334 | 0.2450059          | 0.0061753 | 0.0074 | 0.8333        | 0.404937 | 1.411         | 0.158256      | 1.4109616        | 0.1582559        |
| 26 | k__Bacteria_p__Firmicutes_c__Erysipelotrichi_o__Erysipelotrichales_f__Erysi  | 303                   | 590         | 13.142373        | -0.01526             | 0.0273 | -0.5599 | 0.5756993          | 0.0029155 | 0.009  | 0.3233        | 0.746591 | -0.167        | 0.867166      | -0.5596777       | 0.5756993        |
| 27 | k__Bacteria_p__Firmicutes_c__Erysipelotrichi_o__Erysipelotrichales_f__Erysi  | 312                   | 581         | 3.0791738        | -0.08626             | 0.0269 | -3.2073 | 0.0013878          | -0.002619 | 0.0136 | -0.1925       | 0.847429 | -2.397        | 0.016539      | -3.1971864       | 0.0013878        |
| 28 | k__Bacteria_p__Proteobacteria_c__Betaproteobacteria_o__Burkholderiales/f     | 574                   | 319         | 4.460815         | 0.064251             | 0.0269 | 2.38995 | 0.0170583          | 0.031191  | 0.0168 | 1.8617        | 0.065581 | 2.9985        | 0.002713      | 2.9985243        | 0.0027129        |
| 29 | k__Bacteria_p__Proteobacteria_c__Deltaproteobacteria_o__Desulfuovibrionia    | 194                   | 699         | 25.858369        | 0.050299             | 0.0312 | 1.6121  | 0.1072946          | -0.003298 | 0.0075 | -0.4374       | 0.661945 | 0.8296        | 0.40676       | 1.6104733        | 0.1072946        |
| 30 | k__Bacteria_p__Proteobacteria_c__Deltaproteobacteria_o__Desulfuovibrionia    | 309                   | 584         | 11.383562        | 0.062805             | 0.0272 | 2.30934 | 0.0211535          | -0.018021 | 0.0096 | -1.8867       | 0.059699 | 0.2986        | 0.765279      | 2.3052341        | 0.0211535        |
| 31 | k__Bacteria_p__Proteobacteria_c__Gammaproteobacteria                         | 467                   | 426         | 36.5             | 0.066791             | 0.0257 | 2.59742 | 0.0095482          | 0.0002591 | 0.008  | 0.0325        | 0.974087 | 1.8556        | 0.063506      | 2.5917742        | 0.0095482        |
| 32 | k__Bacteria_p__Proteobacteria_c__Gammaproteobacteria_o__Pasteurellales       | 538                   | 355         | 15.467606        | 0.078975             | 0.0262 | 3.01706 | 0.0026252          | 0.000774  | 0.0101 | 0.077         | 0.93868  | 2.1817        | 0.029128      | 3.0085291        | 0.0026252        |
| 33 | k__Bacteria_p__Tenericutes                                                   | 323                   | 570         | 90.261404        | 0.064681             | 0.027  | 2.3932  | 0.0169091          | 0.0158099 | 0.0065 | 2.449         | 0.014628 | 3.4154        | 0.000637      | <b>3.4154259</b> | <b>0.0006368</b> |
| 34 | k__Bacteria_p__Verrucomicrobia_c__Verrucomicrobiae_o__Verrucomicrobia        | 245                   | 648         | 282.80401        | -0.03369             | 0.0291 | -1.1561 | 0.2479695          | 0.010003  | 0.0049 | 2.0354        | 0.042215 | 0.6195        | 0.535592      | 2.0313902        | 0.0422154        |

## D. Association with LDL

| No | Taxonomy                                                                                           | Summary of OTUs reads |             |                    | Association with LDL |         |           |          |                    |         |           |            |               |              |                  |                 |
|----|----------------------------------------------------------------------------------------------------|-----------------------|-------------|--------------------|----------------------|---------|-----------|----------|--------------------|---------|-----------|------------|---------------|--------------|------------------|-----------------|
|    |                                                                                                    | No. Absent            | No. Present | meanCountInPresent | Binary Model         |         |           |          | Quantitative model |         |           |            | Meta Analysis |              | Asso. Z value    | Asso. P value   |
|    |                                                                                                    |                       |             |                    | Estimate             | s.e.    | T value   | P value  | Estimate           | s.e.    | T value   | P value    | Meta Z value  | Meta P value |                  |                 |
| 1  | k__Archaea                                                                                         | 388                   | 505         | 358.7926733        | 0.08532              | 0.05862 | 1.455503  | 0.145883 | 0.014              | 0.01198 | 1.12868   | 0.25957429 | 1.825484      | 0.067928     | 1.825484         | 0.067928        |
| 2  | k__Bacteria__Actinobacteria__Coriobacteriia__Coriobacteriales__Coriobacteraceae__Coffeinivibrio    | 823                   | 70          | 22.8               | 0.18903              | 0.10621 | 1.779696  | 0.075468 | 0.051              | 0.04592 | 1.104029  | 0.27358837 | 2.031126      | 0.042242     | 2.031126         | 0.042242        |
| 3  | k__Bacteria__Actinobacteria__Coriobacteriia__Coriobacteriales__Coriobacteraceae__Eggerthella       | 435                   | 458         | 16.80786026        | 0.11134              | 0.05739 | 1.940087  | 0.052685 | 0.006              | 0.01989 | 0.320942  | 0.74840228 | 1.596815      | 0.110307     | 1.9374909        | 0.052685        |
| 4  | k__Bacteriap__Bacteroidetes__Bacteroidia__Bacteroidales                                            | 2                     | 891         | 1100.372615        | 0                    | 0       | 0         | 1        | -0.032             | 0.01638 | -1.928613 | 0.05409814 | -1.361923     | 0.173222     | -1.92605         | 0.054098        |
| 5  | k__Bacteriap__Bacteroidetes__Bacteroidia__Bacteroidales__Bacteroidales__Bacteroidaceae             | 34                    | 859         | 110.9720605        | 0.22043              | 0.1514  | 1.455932  | 0.145765 | -0.034             | 0.01443 | -2.344312 | 0.01929028 | -0.625944     | 0.531352     | -2.339873        | 0.01929         |
| 6  | k__Bacteriap__Bacteroidetes__Bacteroidia__Bacteroidales__Bacteroidales__Bacteroidaceae             | 169                   | 724         | 32.16436464        | -0.00311             | 0.07313 | -0.042513 | 0.966099 | -0.017             | 0.01654 | -1.05436  | 0.29207175 | -0.775052     | 0.438309     | -1.053358        | 0.292072        |
| 7  | k__Bacteriap__Bacteroidetes__Bacteroidia__Bacteroidales__Bacteroidales__Bacteroidaceae             | 5                     | 888         | 407.7556306        | 0                    | 0       | 0         | 1        | -0.014             | 0.01398 | -1.034811 | 0.3010403  | -0.731293     | 0.4646       | -1.034205        | 0.30104         |
| 8  | k__Bacteriap__Bacteroidetes__Bacteroidia__Bacteroidales__Bacteroidales__Bacteroidaceae             | 219                   | 674         | 10.04747774        | -0.07771             | 0.06644 | -1.169692 | 0.242439 | -0.045             | 0.02047 | -2.190746 | 0.02881446 | -2.372292     | 0.017678     | -2.372292        | 0.017678        |
| 9  | k__Bacteriap__Bacteroidetes__Bacteroidia__Bacteroidales__Bacteroidales__Bacteroidaceae             | 410                   | 483         | 7.126293996        | -0.10736             | 0.05736 | -1.871629 | 0.061586 | -0.062             | 0.02538 | -2.426796 | 0.0156015  | -3.031627     | 0.002432     | -3.031627        | 0.002432        |
| 10 | k__Bacteriap__Bacteroidetes__Bacteroidia__Bacteroidales__Bacteroidales__Bacteroidaceae             | 316                   | 577         | 5.771230503        | -0.09969             | 0.05987 | -1.665163 | 0.096233 | -0.019             | 0.0245  | -0.768143 | 0.44271924 | -1.718981     | 0.085618     | -1.718981        | 0.085618        |
| 11 | k__Bacteriap__Bacteroidetes__Bacteroidia__Bacteroidales__Bacteroidales__Bacteroidaceae             | 125                   | 768         | 39.30208333        | -0.03399             | 0.08246 | -0.412226 | 0.680273 | 0.018              | 0.01489 | 1.185475  | 0.23619877 | 0.546206      | 0.584925     | 1.1845415        | 0.236199        |
| 12 | k__Bacteriap__Bacteroidetes__Bacteroidia__Bacteroidales__Bacteroidales__Bacteroidaceae             | 658                   | 235         | 104                | -0.06647             | 0.06603 | -1.006612 | 0.314395 | -0.028             | 0.0198  | -1.404966 | 0.1613747  | -1.701656     | 0.08882      | -1.701656        | 0.08882         |
| 13 | k__Bacteriap__Cyanobacteria                                                                        | 429                   | 464         | 12.3362069         | -0.09468             | 0.05738 | -1.650018 | 0.099293 | 0.012              | 0.02264 | 0.551303  | 0.58169438 | -0.775965     | 0.43777      | -1.648291        | 0.099293        |
| 14 | k__Bacteriap__Firmicutes__Bacilli__Gemmatimonadetes__Gemmatimonadetes                              | 524                   | 369         | 2.989159892        | 0.02533              | 0.05812 | 0.435749  | 0.663125 | 0.003              | 0.04084 | 0.074684  | 0.94905076 | 0.360791      | 0.178256     | 0.4356032        | 0.663125        |
| 15 | k__Bacteriap__Firmicutes__Clostridia__Clostridiales__Mollicutes__Mollicutes                        | 341                   | 552         | 6.128623188        | -0.06359             | 0.05899 | -1.077971 | 0.28134  | -0.029             | 0.02657 | -1.094487 | 0.274223   | -1.534919     | 0.124804     | -1.534919        | 0.124804        |
| 16 | k__Bacteriap__Firmicutes__Clostridia__Clostridiales__Clostridiales__Lachnospiraceae                | 841                   | 52          | 26.48076923        | 0.38113              | 0.12206 | 3.122418  | 0.001852 | 0.18               | 0.07179 | 2.51094   | 0.01546218 | 3.913406      | 9.10E-05     | <b>3.9134057</b> | <b>9.10E-05</b> |
| 17 | k__Bacteriap__Firmicutes__Clostridia__Clostridiales__Mollicutes__Mollicutes                        | 655                   | 238         | 4.714285714        | 0.00602              | 0.0652  | 0.092368  | 0.926427 | -0.103             | 0.04039 | -2.545515 | 0.0115547  | -1.720474     | 0.085346     | -2.52546         | 0.011555        |
| 18 | k__Bacteriap__Firmicutes__Clostridia__Clostridiales__Christensenellaceae                           | 232                   | 661         | 38.25567322        | -0.00814             | 0.06605 | -0.123174 | 0.901998 | 0.003              | 0.01539 | 0.197543  | 0.84346402 | 0.052557      | 0.958085     | 0.1974646        | 0.843464        |
| 19 | k__Bacteriap__Firmicutes__Clostridia__Clostridiales__Clostridiales                                 | 84                    | 809         | 11.82076638        | 0.14736              | 0.09894 | 1.489347  | 0.136751 | 0.027              | 0.02051 | 1.320646  | 0.18699491 | 1.985217      | 0.04712      | 1.985217         | 0.04712         |
| 20 | k__Bacteriap__Firmicutes__Clostridia__Clostridiales__Clostridiales__Lachnospiraceae                | 399                   | 494         | 6.194331984        | 0.04373              | 0.05821 | 0.751291  | 0.452677 | 0.053              | 0.02773 | 1.920841  | 0.05533171 | 1.886011      | 0.059293     | 1.9162624        | 0.055332        |
| 21 | k__Bacteriap__Firmicutes__Clostridia__Clostridiales__Clostridiales__Lachnospiraceae                | 612                   | 281         | 2.839857651        | 0.07698              | 0.06165 | 1.248603  | 0.21214  | 0.023              | 0.04718 | 0.48349   | 0.62912974 | 1.223759      | 0.221043     | 1.2477039        | 0.21214         |
| 22 | k__Bacteriap__Firmicutes__Clostridia__Clostridiales__Lachnospiraceae                               | 1                     | 892         | 162.4753363        | 0                    | 0       | 0         | 1        | -0.078             | 0.03576 | -2.176524 | 0.02977923 | -1.536553     | 0.124403     | -2.173014        | 0.029779        |
| 23 | k__Bacteriap__Firmicutes__Clostridia__Clostridiales__Lachnospiraceae__Blautia                      | 51                    | 842         | 8.956057007        | -0.05312             | 0.12325 | -0.430973 | 0.666593 | -0.007             | 0.02227 | -0.326275 | 0.74429768 | -0.535277     | 0.592458     | -0.535277        | 0.592458        |
| 24 | k__Bacteriap__Firmicutes__Clostridia__Clostridiales__Lachnospiraceae__Coprococcus                  | 414                   | 479         | 6.565762004        | -0.05132             | 0.05832 | -0.879999 | 0.379098 | -0.071             | 0.02941 | -2.412324 | 0.01622998 | -2.321617     | 0.020254     | -2.403702        | 0.01623         |
| 25 | k__Bacteriap__Firmicutes__Clostridia__Clostridiales__Lachnospiraceae__Lachnospira                  | 181                   | 712         | 24.56320225        | -0.13729             | 0.07112 | -1.930349 | 0.053882 | -0.007             | 0.01674 | -0.391297 | 0.69569562 | -1.639726     | 0.101062     | -1.927786        | 0.053882        |
| 26 | k__Bacteriap__Firmicutes__Frypanobacteriia__Frypanobacteriales__Frypanobacteriaceae__Frypanobacter | 303                   | 590         | 13.14237288        | 0.08155              | 0.06051 | 1.347604  | 0.17813  | 0.035              | 0.02075 | 1.698302  | 0.08998164 | 2.151041      | 0.031473     | 2.1510409        | 0.031473        |
| 27 | k__Bacteriap__Firmicutes__Frypanobacteriia__Frypanobacteriales__Frypanobacteriaceae__Frypanobacter | 312                   | 581         | 3.079173838        | -3.21E-06            | 0.06012 | -5.35E-05 | 0.999957 | 0.007              | 0.03204 | 0.218836  | 0.82685506 | 0.154632      | 0.877111     | 0.2187368        | 0.826855        |
| 28 | k__Bacteriap__Proteobacteria__Betaproteobacteria__Burkholderiales__Rhodocyclaceae                  | 574                   | 319         | 4.460815047        | -0.03585             | 0.05993 | -0.598158 | 0.549887 | 0.041              | 0.03541 | 1.164805  | 0.24497944 | 0.399304      | 0.689669     | 1.1626305        | 0.244979        |
| 29 | k__Bacteriap__Proteobacteria__Betaproteobacteria__Burkholderiales__Rhodocyclaceae                  | 194                   | 699         | 25.8583691         | -0.04258             | 0.06943 | -0.613296 | 0.539837 | 0.007              | 0.01628 | 0.405226  | 0.68543999 | -0.14708      | 0.883069     | -0.613059        | 0.539837        |
| 30 | k__Bacteriap__Proteobacteria__Betaproteobacteria__Burkholderiales__Rhodocyclaceae                  | 309                   | 584         | 11.38356164        | 0.0043               | 0.06062 | 0.070891  | 0.9435   | 0.019              | 0.0206  | 0.903702  | 0.36652946 | 0.688626      | 0.491059     | 0.9029933        | 0.366529        |
| 31 | k__Bacteriap__Proteobacteria__Gammaproteobacteria                                                  | 467                   | 426         | 36.5               | -0.07801             | 0.05731 | -1.361354 | 0.173747 | -0.038             | 0.01761 | -2.168206 | 0.03070248 | -2.489842     | 0.01278      | -2.489842        | 0.01278         |
| 32 | k__Bacteriap__Proteobacteria__Gammaproteobacteria__Pasteurellales__Pasteurellaceae                 | 538                   | 355         | 15.46760563        | -0.05814             | 0.05844 | -0.994794 | 0.320107 | -0.047             | 0.02243 | -2.089419 | 0.03739165 | -2.174848     | 0.029642     | -2.174848        | 0.029642        |
| 33 | k__Bacteriap__Tenericutes                                                                          | 323                   | 570         | 90.26140351        | -0.13584             | 0.06009 | -2.260652 | 0.024022 | 4E-04              | 0.01409 | 0.030623  | 0.97558098 | -1.574136     | 0.115456     | -2.256774        | 0.024022        |
| 34 | k__Bacteriap__Tenericutes__Mollicutes__Mollicutes                                                  | 245                   | 648         | 282.8040123        | -0.03897             | 0.0648  | -0.601344 | 0.547764 | 0.01               | 0.01094 | 0.877709  | 0.38042939 | 0.195156      | 0.845271     | 0.8771054        | 0.380429        |

## E. Association with TC.

| No | Taxonomy                                                                                                        | Summary of OTUs reads |             |                     | Association with TC |         |            |          |                    |         |          |          |               |              |              |               |
|----|-----------------------------------------------------------------------------------------------------------------|-----------------------|-------------|---------------------|---------------------|---------|------------|----------|--------------------|---------|----------|----------|---------------|--------------|--------------|---------------|
|    |                                                                                                                 | No. Absent            | No. Present | meanCounts/Presents | Binary Model        |         |            |          | Quantitative model |         |          |          | Meta Analysis |              | Std. Z value | Asso. P value |
|    |                                                                                                                 |                       |             |                     | Estimate            | s.e.    | T value    | P value  | Estimate           | s.e.    | T value  | P value  | Meta Z value  | Meta P value |              |               |
| 1  | k__Archaea                                                                                                      | 388                   | 505         | 358.7326733         | 0.094513            | 0.0633  | 1.49312303 | 0.13576  | 0.0083             | 0.0128  | 0.648611 | 0.516887 | 1.5131505     | 0.130242     | 1.51315      | 0.13024       |
| 2  | k__Bacteria_p__Actinobacteria_c__Coriobacteriales_o__Coriobacteraceae_g__Collaredactinonema                     | 823                   | 70          | 22.8                | 0.201735            | 0.1147  | 1.75876895 | 0.078961 | 0.09485            | 0.04793 | 1.97908  | 0.051981 | 2.6163184     | 0.008888     | 2.61632      | 0.00889       |
| 3  | k__Bacteria_p__Actinobacteria_c__Coriobacteriales_o__Coriobacteriaceae_g__Eggerthella                           | 435                   | 458         | 16.80786026         | 0.106938            | 0.062   | 1.72480238 | 0.084911 | 0.00761            | 0.02128 | 0.357786 | 0.72067  | 1.4710926     | 0.141266     | 1.72288      | 0.08491       |
| 4  | k__Bacteria_p__Bacteroidetes_c__Bacteroidia_o__Bacteroidales                                                    | 2                     | 891         | 1100.372615         | 0                   | 0       | 0          | 1        | -0.03449           | 0.01762 | -1.95764 | 0.050586 | -1.382378     | 0.168856     | -1.955       | 0.05059       |
| 5  | k__Bacteria_p__Bacteroidetes_c__Bacteroidia_o__Bacteroidales_f__Bacteroidaceae_g__Rikenellaceae                 | 34                    | 859         | 110.9720605         | 0.159131            | 0.1636  | 0.97265355 | 0.33099  | -0.04027           | 0.01555 | -2.58905 | 0.009788 | -1.139232     | 0.254606     | -2.5832      | 0.00979       |
| 6  | k__Bacteria_p__Bacteroidetes_c__Bacteroidia_o__Bacteroidales_f__S24-7/Barnesiellaceae                           | 169                   | 724         | 32.16436464         | -0.04329            | 0.07896 | -0.5483379 | 0.583598 | -0.02576           | 0.01767 | -1.45726 | 0.145479 | -1.416917     | 0.156507     | -1.4557      | 0.14548       |
| 7  | k__Bacteria_p__Bacteroidetes_c__Bacteroidia_o__Bacteroidales_f__Bacteroidaceae_g__Bacteroides                   | 5                     | 888         | 407.7556306         | 0                   | 0       | 0          | 1        | -0.01332           | 0.01503 | -0.88606 | 0.375826 | -0.626223     | 0.531168     | -0.8856      | 0.37583       |
| 8  | k__Bacteria_p__Bacteroidetes_c__Bacteroidia_o__Bacteroidales_f__Odoribacteraceae                                | 219                   | 674         | 10.04747774         | -0.11395            | 0.0717  | -1.5892516 | 0.11236  | -0.04275           | 0.02195 | -1.94813 | 0.051818 | -2.497729     | 0.012499     | -2.4977      | 0.0125        |
| 9  | k__Bacteria_p__Bacteroidetes_c__Bacteroidia_o__Bacteroidales_f__Odoribacteraceae_g__Butyrivibrio                | 410                   | 483         | 7.126293996         | -0.11871            | 0.06194 | -1.9165791 | 0.055612 | -0.06566           | 0.02742 | -2.39443 | 0.01703  | -3.04064      | 0.002361     | -3.0406      | 0.00236       |
| 10 | k__Bacteria_p__Bacteroidetes_c__Bacteroidia_o__Bacteroidales_f__Odoribacteraceae_g__Odoribacter                 | 316                   | 577         | 5.771230503         | -0.13137            | 0.0646  | -2.0335694 | 0.042292 | -0.00677           | 0.02604 | -0.2601  | 0.79488  | -1.619709     | 0.105295     | -2.0306      | 0.04229       |
| 11 | k__Bacteria_p__Bacteroidetes_c__Bacteroidia_o__Bacteroidales_f__Rikenellaceae                                   | 125                   | 768         | 39.30208333         | -0.07814            | 0.08901 | -0.8778199 | 0.380279 | 0.01901            | 0.01599 | 1.188777 | 0.234887 | 0.2195251     | 0.826241     | 1.18784      | 0.2348        |
| 12 | k__Bacteria_p__Bacteroidetes_c__Bacteroidia_o__Bacteroidales_f__S24-7                                           | 658                   | 235         | 104                 | -0.09796            | 0.07127 | -1.3744736 | 0.169641 | -0.0396            | 0.02185 | -1.81216 | 0.071259 | -2.246604     | 0.024665     | -2.2466      | 0.02467       |
| 13 | k__Bacteria_p__Cyanobacteria                                                                                    | 429                   | 464         | 12.3362069          | -0.09597            | 0.06198 | -1.5485533 | 0.121845 | 0.02139            | 0.02426 | 0.881773 | 0.378361 | -0.471042     | 0.637611     | -1.5471      | 0.12185       |
| 14 | k__Bacteria_p__Firmicutes_c__Bacilli_o__Gemellales/Bacillales                                                   | 524                   | 369         | 2.989159892         | 0.056479            | 0.06274 | 0.9002184  | 0.368248 | 0.03218            | 0.04296 | 0.749212 | 0.454212 | 1.1654328     | 0.243844     | 1.16543      | 0.24384       |
| 15 | k__Bacteria_p__Firmicutes_c__Clostridia_o__Clostridiales_f__Magbacteriaceae(Clostridiales/Lachnospiraceae       | 341                   | 552         | 6.128623188         | -0.05317            | 0.06372 | -0.8344071 | 0.404276 | -0.01002           | 0.02851 | -0.35133 | 0.725477 | -0.838032     | 0.402012     | -0.838       | 0.40201       |
| 16 | k__Bacteria_p__Firmicutes_c__Clostridia_o__Clostridiales_f__Clostridiaceae/Lachnospiraceae                      | 841                   | 52          | 26.48076923         | 0.304537            | 0.13214 | 2.30468119 | 0.021414 | 0.16968            | 0.07395 | 2.294583 | 0.026173 | 3.1991158     | 0.001378     | 3.19912      | 0.00138       |
| 17 | k__Bacteria_p__Firmicutes_c__Clostridia_o__Clostridiales_f__Pyrospiraceae(Magbacteriaceae/Clostridiales         | 655                   | 238         | 4.714285714         | 0.066863            | 0.07037 | 0.95016061 | 0.342289 | -0.06855           | 0.04294 | -1.59638 | 0.111753 | -0.453051     | 0.650512     | -1.5904      | 0.11175       |
| 18 | k__Bacteria_p__Firmicutes_c__Clostridia_o__Clostridiales_f__Christensenellaceae                                 | 232                   | 661         | 38.25567322         | -0.05606            | 0.0713  | -0.7861758 | 0.431974 | 0.00999            | 0.01625 | 0.614629 | 0.539013 | -0.121227     | 0.903472     | -0.7858      | 0.43197       |
| 19 | k__Bacteria_p__Firmicutes_c__Clostridia_o__Clostridiales_f__Clostridiaceae                                      | 84                    | 809         | 11.82076638         | 0.159967            | 0.10685 | 1.49718434 | 0.134701 | 0.00762            | 0.02226 | 0.34251  | 0.732057 | 1.2998111     | 0.193666     | 1.49582      | 0.1347        |
| 20 | k__Bacteria_p__Firmicutes_c__Clostridia_o__Clostridiales_f__Clostridiaceae_g__O2406                             | 309                   | 404         | 6.194331984         | 0.048177            | 0.06286 | 0.76645533 | 0.443609 | 0.02047            | 0.02972 | 0.688909 | 0.491206 | 1.0284898     | 0.30372      | 1.02849      | 0.30372       |
| 21 | k__Bacteria_p__Firmicutes_c__Clostridia_o__Clostridiales_f__Dehalobacteriaceae_g__Dehalobacterium               | 612                   | 281         | 2.839857651         | 0.066697            | 0.0666  | 1.00150503 | 0.316856 | 0.05977            | 0.04934 | 1.211529 | 0.226725 | 1.5625493     | 0.118159     | 1.56255      | 0.11816       |
| 22 | k__Bacteria_p__Firmicutes_c__Clostridia_o__Clostridiales_f__Lachnospiraceae                                     | 1                     | 892         | 162.4753363         | 0                   | 0       | 0          | 1        | -0.05033           | 0.03868 | -1.30107 | 0.193573 | -0.919297     | 0.35794      | -1.3001      | 0.19357       |
| 23 | k__Bacteria_p__Firmicutes_c__Clostridia_o__Clostridiales_f__Lachnospiraceae_g__Blautia                          | 51                    | 842         | 8.956057007         | -0.04754            | 0.1331  | -0.3571525 | 0.721063 | 0.00811            | 0.02409 | 0.336823 | 0.726334 | -0.014374     | 0.988532     | -0.357       | 0.72106       |
| 24 | k__Bacteria_p__Firmicutes_c__Clostridia_o__Clostridiales_f__Lachnospiraceae_g__Coproccoccus                     | 414                   | 479         | 6.565762004         | -0.0645             | 0.06297 | -1.0244093 | 0.305921 | -0.0875            | 0.03109 | -2.81442 | 0.00509  | -2.704759     | 0.006835     | -2.8013      | 0.00509       |
| 25 | k__Bacteria_p__Firmicutes_c__Clostridia_o__Clostridiales_f__Lachnospiraceae_g__Lachnospira                      | 181                   | 712         | 24.56320225         | -0.22652            | 0.07659 | -2.9576853 | 0.003182 | 0.00061            | 0.01801 | 0.038884 | 0.97298  | -2.061738     | 0.039233     | -2.9496      | 0.00318       |
| 26 | k__Bacteria_p__Firmicutes_c__Erysipelotrichia_o__Erysipelotrichales_f__Erysipelotrichaceae_g__cc_115            | 303                   | 590         | 13.14237288         | 0.065539            | 0.06538 | 1.00250652 | 0.316372 | 0.0437             | 0.02225 | 1.964265 | 0.049972 | 2.0945511     | 0.036211     | 2.09456      | 0.03621       |
| 27 | k__Bacteria_p__Firmicutes_c__Erysipelotrichia_o__Erysipelotrichales_f__Erysipelotrichaceae_g__Holdemania        | 312                   | 581         | 3.079173838         | -0.03313            | 0.06491 | -0.5104387 | 0.609871 | 0.01965            | 0.03515 | 0.559132 | 0.576289 | 0.0343342     | 0.972611     | 0.55881      | 0.57629       |
| 28 | k__Bacteria_p__Proteobacteria_c__Betaproteobacteria_o__Burkholderiales/Rhodocyclales                            | 574                   | 319         | 4.460815047         | -0.02753            | 0.06472 | -0.4253414 | 0.670691 | 0.04364            | 0.03945 | 1.10614  | 0.26951  | 0.4801195     | 0.631142     | 1.10419      | 0.26951       |
| 29 | k__Bacteria_p__Proteobacteria_c__Deltaproteobacteria_o__Desulfosulfolobales_f__Desulfosulfolobaceae             | 194                   | 699         | 25.8583691          | -0.03672            | 0.07498 | -0.489738  | 0.62444  | -0.00408           | 0.01761 | -0.23169 | 0.816844 | -0.509947     | 0.610089     | -0.5099      | 0.61009       |
| 30 | k__Bacteria_p__Proteobacteria_c__Deltaproteobacteria_o__Desulfosulfolobales_f__Desulfosulfolobaceae_g__Bilophia | 309                   | 584         | 11.38356164         | -0.059928           | 0.06543 | 0.91585269 | 0.359993 | -0.00343           | 0.02243 | -0.15292 | 0.878512 | 0.5931853     | 0.589759     | 0.91518      | 0.35999       |
| 31 | k__Bacteria_p__Proteobacteria_c__Gammaproteobacteria                                                            | 467                   | 426         | 36.5                | -0.06323            | 0.06191 | -1.0212402 | 0.307419 | -0.04804           | 0.01871 | -2.56781 | 0.010579 | -2.529303     | 0.011429     | -2.5263      | 0.01058       |
| 32 | k__Bacteria_p__Proteobacteria_c__Gammaproteobacteria_o__Pasteurellales_f__Pasteurellaceae                       | 538                   | 355         | 15.46760563         | -0.05664            | 0.06311 | -0.8974532 | 0.36972  | -0.05617           | 0.02397 | -2.34313 | 0.019682 | -2.283497     | 0.022401     | -2.3124      | 0.01968       |
| 33 | k__Bacteria_p__Tenericutes                                                                                      | 323                   | 570         | 90.26140351         | -0.1802             | 0.06479 | -2.7812277 | 0.00553  | 0.01477            | 0.01503 | 0.982871 | 0.326091 | -1.267419     | 0.205005     | -2.7744      | 0.00553       |
| 34 | k__Bacteria_p__Verrucomicrobia_c__Verrucomicrobiales_f__Verrucomicrobiales_g__Akermansia                        | 245                   | 648         | 282.8040123         | -0.06493            | 0.06995 | -0.9282257 | 0.353543 | 0.00059            | 0.01186 | 0.497201 | 0.619217 | -0.304607     | 0.760666     | -0.9277      | 0.35354       |

## Online Table VI. The association between microbes and the SNPs associated with lipids and BMI at P value $1 \times 10^{-5}$

None of the associations were significant at FDR 0.05 level after correcting for multiple tests.

### A. Association with lipid-associated SNPs

| PValue   | SNPName    | SNPChr | SNPChrPos | Microbe                                                                                          | SNPType | AlleleAssessed | OverallZScore | DatasetsWhere | DatasetsZScore | DatasetsNrSam | FDR |
|----------|------------|--------|-----------|--------------------------------------------------------------------------------------------------|---------|----------------|---------------|---------------|----------------|---------------|-----|
| 1.03E-05 | rs4660293  | 1      | 40028180  | k__Bacteria_p__Firmicutes_c__Clostridia_o__Clostridiales_f__Lachnospiraceae_GG_3998460           | A/G     | G              | 4.4106452     | LLD           | 4.4106452      | 893           | 1   |
| 1.36E-05 | rs12328675 | 2      | 165540800 | k__Bacteria_p__Bacteroidetes_c__Bacteroidia_o__Bacteroidales_f__Bacteroidaceae_GG_2612154        | T/C     | C              | 4.3499897     | LLD           | 4.3499897      | 893           | 1   |
| 1.79E-05 | rs3136441  | 11     | 46743247  | k__Bacteria_p__Firmicutes_c__Clostridia_o__Clostridiales_GG_1945574                              | T/C     | C              | 4.2893612     | LLD           | 4.2893612      | 893           | 1   |
| 2.35E-05 | rs2814982  | 6      | 34546560  | k__Bacteria_p__Firmicutes_c__Clostridia_o__Clostridiales_GG_263839                               | C/T     | T              | 4.2287593     | LLD           | 4.2287593      | 893           | 1   |
| 2.35E-05 | rs2290159  | 3      | 12628920  | k__Bacteria_p__Actinobacteria_c__Coriobacteriales_f__Coriobacteraceae_GG_412475                  | G/C     | C              | 4.2287593     | LLD           | 4.2287593      | 893           | 1   |
| 3.99E-05 | rs4942486  | 13     | 32953388  | k__Bacteria_p__Firmicutes_c__Clostridia_o__Clostridiales_f__Ruminococcaceae_GG_4409643           | T/C     | T              | -4.1076336    | LLD           | -4.1076336     | 893           | 1   |
| 5.18E-05 | rs9376090  | 6      | 135411228 | k__Bacteria_p__Firmicutes_c__Clostridia_o__Clostridiales_GG_197302                               | T/C     | C              | -4.047109     | LLD           | -4.047109      | 893           | 1   |
| 5.18E-05 | rs10128711 | 11     | 18632984  | k__Bacteria_p__Firmicutes_c__Clostridia_o__Clostridiales_GG_539352                               | T/C     | T              | -4.047109     | LLD           | -4.047109      | 893           | 1   |
| 5.19E-05 | rs12748152 | 1      | 27138393  | k__Bacteria_p__Firmicutes_c__Clostridia_o__Clostridiales_f__Ruminococcaceae_GG_288810            | C/T     | T              | 4.047109      | LLD           | 4.047109       | 893           | 1   |
| 5.90E-05 | rs838880   | 12     | 125261593 | k__Bacteria_p__Firmicutes_c__Bacilli_o__Lactobacillales_f__Lactobacillaceae_GG_259975            | T/C     | C              | 4.0168561     | LLD           | 4.0168561      | 893           | 1   |
| 6.70E-05 | rs2814982  | 6      | 34546560  | k__Bacteria_p__Firmicutes_c__Clostridia_o__Clostridiales_f__Lachnospiraceae_GG_379905            | C/T     | T              | 3.9866094     | LLD           | 3.9866094      | 893           | 1   |
| 6.70E-05 | rs7134375  | 12     | 20473758  | k__Bacteria_p__Firmicutes_c__Clostridia_o__Clostridiales_f__Ruminococcaceae_GG_208879            | C/A     | A              | 3.9866094     | LLD           | 3.9866094      | 893           | 1   |
| 6.70E-05 | rs7134375  | 12     | 20473758  | k__Bacteria_p__Firmicutes_c__Gemmatimonadetes_c__Gemmatimonadetes_f__Gemmatimonadaceae_GG_151512 | C/A     | A              | 3.9866094     | LLD           | 3.9866094      | 893           | 1   |
| 6.70E-05 | rs7134375  | 12     | 20473758  | k__Bacteria_p__Firmicutes_c__Gemmatimonadetes_c__Gemmatimonadetes_f__Gemmatimonadaceae_GG_151512 | C/A     | A              | 3.9866094     | LLD           | 3.9866094      | 893           | 1   |
| 6.70E-05 | rs2290159  | 3      | 12628920  | k__Bacteria_p__Lentisphaerae_c__Lentisphaeria_o__Victivallales                                   | G/C     | C              | 3.9866094     | LLD           | 3.9866094      | 893           | 1   |
| 6.70E-05 | rs2290159  | 3      | 12628920  | k__Bacteria_p__Lentisphaerae_c__Lentisphaeria_o__Victivallales_f__Victivallaceae                 | G/C     | C              | 3.9866094     | LLD           | 3.9866094      | 893           | 1   |
| 7.62E-05 | rs7134375  | 12     | 20473758  | k__Bacteria_p__Firmicutes_c__Bacilli_o__Lactobacillales_f__Lactobacillaceae_GG_4168094           | C/A     | A              | 3.9563688     | LLD           | 3.9563688      | 893           | 1   |
| 7.62E-05 | rs7134375  | 12     | 20473758  | k__Bacteria_p__Bacteroidetes_c__Bacteroidia_o__Bacteroidales_f__Porphyromonadaceae_GG_554296     | C/A     | A              | 3.9563688     | LLD           | 3.9563688      | 893           | 1   |
| 7.62E-05 | rs2290159  | 3      | 12628920  | k__Bacteria_p__Lentisphaerae                                                                     | G/C     | C              | 3.9563688     | LLD           | 3.9563688      | 893           | 1   |
| 7.62E-05 | rs2290159  | 3      | 12628920  | k__Bacteria_p__Lentisphaerae_c__Lentisphaeria                                                    | G/C     | C              | 3.9563688     | LLD           | 3.9563688      | 893           | 1   |
| 7.62E-05 | rs10128711 | 11     | 18632984  | k__Bacteria_p__Firmicutes_c__Clostridia_o__Clostridiales_f__Ruminococcaceae_GG_208810            | T/C     | T              | 3.9563688     | LLD           | 3.9563688      | 893           | 1   |
| 8.63E-05 | rs11246602 | 11     | 51512090  | k__Bacteria_p__Firmicutes_c__Clostridia_o__Clostridiales_f__Ruminococcaceae_GG_193850            | T/C     | C              | -3.9261344    | LLD           | -3.9261344     | 893           | 1   |
| 8.63E-05 | rs645040   | 3      | 135926622 | k__Bacteria_p__Firmicutes_c__Clostridia_o__Clostridiales_GG_198051                               | T/G     | G              | -3.9261344    | LLD           | -3.9261344     | 893           | 1   |
| 9.78E-05 | rs10128711 | 11     | 18632984  | k__Bacteria_p__Firmicutes_c__Clostridia_o__Clostridiales_f__Ruminococcaceae_f__Faecalibacterium  | T/C     | T              | -3.895906     | LLD           | -3.895906      | 893           | 1   |
| 9.78E-05 | rs10128711 | 11     | 18632984  | k__Bacteria_p__Firmicutes_c__Clostridia_o__Clostridiales_f__Ruminococcaceae_f__Faecalibacterium  | T/C     | T              | -3.895906     | LLD           | -3.895906      | 893           | 1   |
| 9.78E-05 | rs10128711 | 11     | 18632984  | k__Bacteria_p__Firmicutes_c__Clostridia_o__Clostridiales_f__Ruminococcaceae_f__Faecalibacterium  | T/C     | T              | -3.895906     | LLD           | -3.895906      | 893           | 1   |

### B. Association with BMI-associated SNPs

| SNPName    | SNPChr | SNPChrPos | Microbe                                                                                              | SNPType | AlleleAssessed | OverallZScore | DatasetsWhere | DatasetsZScore | DatasetsNrSam | FDR  |
|------------|--------|-----------|------------------------------------------------------------------------------------------------------|---------|----------------|---------------|---------------|----------------|---------------|------|
| rs4787491  | 16     | 30015337  | k__Bacteria_p__Firmicutes_c__Clostridia_o__Clostridiales_f__Ruminococcaceae_GG_1703711               | A/G     | A              | 4.4713281     | LLD           | 4.4713281      | 893           | 0.85 |
| rs4787491  | 16     | 30015337  | k__Bacteria_p__Firmicutes_c__Clostridia_o__Clostridiales_GG_370063                                   | A/G     | A              | 4.3499897     | LLD           | 4.3499897      | 893           | 1    |
| rs13201877 | 6      | 137675541 | k__Bacteria_p__Firmicutes_c__Clostridia_o__Clostridiales_GG_34139                                    | A/G     | G              | 4.1984681     | LLD           | 4.1984681      | 893           | 1    |
| rs4787491  | 16     | 30015337  | k__Bacteria_p__Firmicutes_c__Clostridia_o__Clostridiales_f__Ruminococcaceae_GG_322719                | A/G     | A              | 4.1984681     | LLD           | 4.1984681      | 893           | 1    |
| rs7164727  | 15     | 73093991  | k__Bacteria_p__Firmicutes_c__Clostridia_o__Clostridiales_GG_192201                                   | C/T     | C              | 4.1681835     | LLD           | 4.1681835      | 893           | 1    |
| rs1460676  | 2      | 164567689 | k__Bacteria_p__Firmicutes_c__Clostridia_o__Clostridiales_f__Dehalobacteriaceae_f__Dehalobacterium    | T/C     | C              | -4.1379053    | LLD           | -4.1379053     | 893           | 1    |
| rs4787491  | 16     | 30015337  | k__Bacteria_p__Firmicutes_c__Clostridia_o__Clostridiales_GG_4439795                                  | A/G     | A              | 4.1379053     | LLD           | 4.1379053      | 893           | 1    |
| rs1516725  | 3      | 185824004 | k__Bacteria_p__Firmicutes_c__Clostridia_o__Clostridiales_f__Ruminococcaceae_GG_207252                | C/T     | T              | 4.0773681     | LLD           | 4.0773681      | 893           | 1    |
| rs4787491  | 16     | 30015337  | k__Bacteria_p__Firmicutes_c__Clostridia_o__Clostridiales_f__Ruminococcaceae_GG_288588                | A/G     | A              | 4.0168561     | LLD           | 4.0168561      | 893           | 1    |
| rs4787491  | 16     | 30015337  | k__Bacteria_p__Firmicutes_c__Clostridia_o__Clostridiales_f__Ruminococcaceae_GG_312766                | A/G     | A              | 4.0168561     | LLD           | 4.0168561      | 893           | 1    |
| rs1460676  | 2      | 164567689 | k__Bacteria_p__Firmicutes_c__Clostridia_o__Clostridiales_f__Dehalobacteriaceae                       | T/C     | C              | -3.9563688    | LLD           | -3.9563688     | 893           | 1    |
| rs4787491  | 16     | 30015337  | k__Bacteria_p__Firmicutes_c__Clostridia_o__Clostridiales_GG_584417                                   | A/G     | A              | 3.9563688     | LLD           | 3.9563688      | 893           | 1    |
| rs4787491  | 16     | 30015337  | k__Bacteria_p__Bacteroidetes_c__Bacteroidia_o__Bacteroidales_f__Dodonbacteriaceae_f__Bifidobacterium | A/G     | A              | 3.895906      | LLD           | 3.895906       | 893           | 1    |



### Online Figure I. The workflow of the two-part model

**A.** The distribution of microbe X. The brown bar indicates the number of subjects with zero value of microbe X, i.e. none of this particular microbe (also called “spike”) and the green bars indicate the destruction of non-zero. The spike shows the departure of the distribution from a normal distribution. **B.** The distribution of lipid Y. After transformation, the lipid distribution is close to a normal distribution. **C.** The binary feature of microbe X. The subjects are divided into two groups (zero vs non-zero). **D.** The binary model to test whether the lipid level is significantly different between the two groups (zero vs non-zero). **E.** The distribution of lipid Y for the subjects with non-zero. **F.** Quantitative feature of microbe X: the distribution of non-zero values. **G.** The quantitative model to test whether the abundance of lipid X is associated with the abundance of microbe X. The signals from the binary model and quantitative model are combined using meta-analysis.

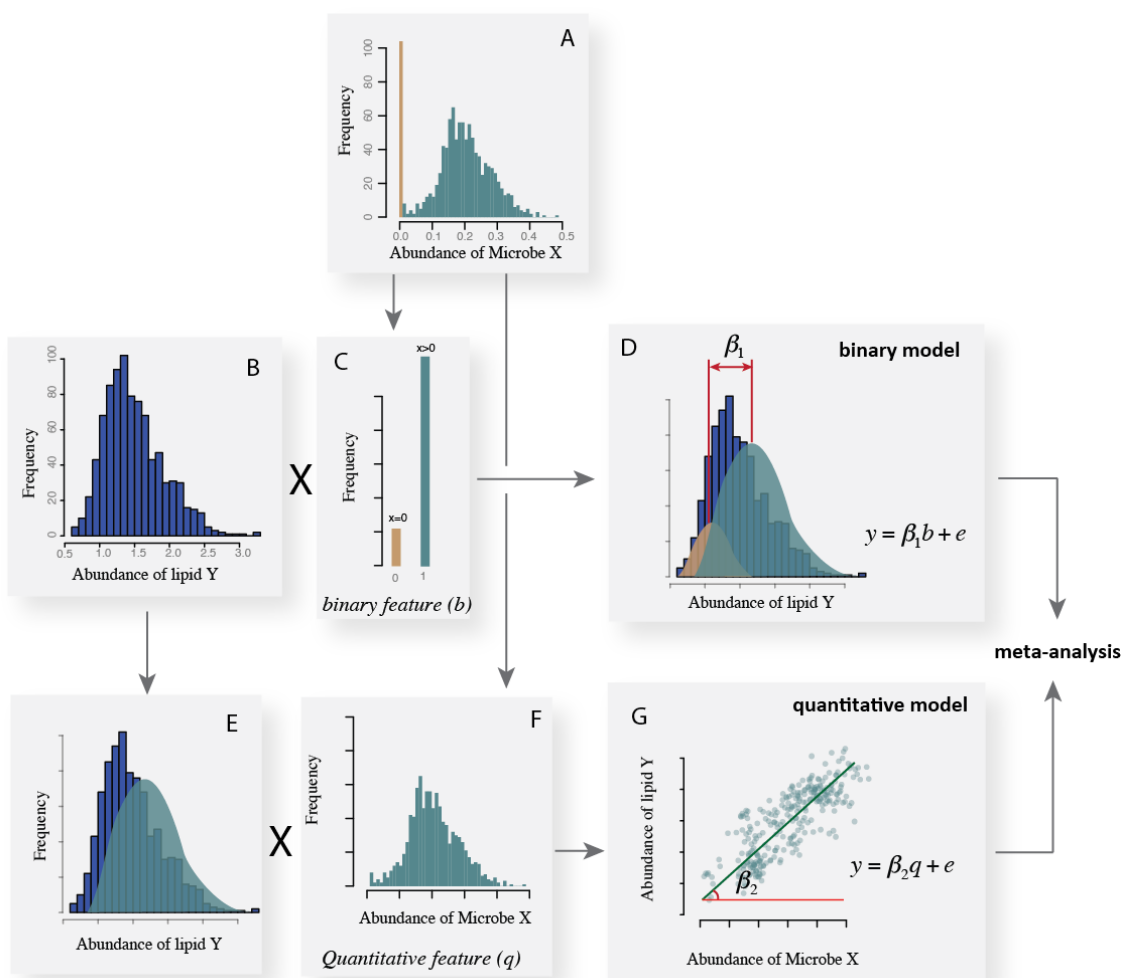

**Online Figure II. The number of OTUs associated with TG, HDL and BMI at FDR < 0.05 and their overlaps with each other**

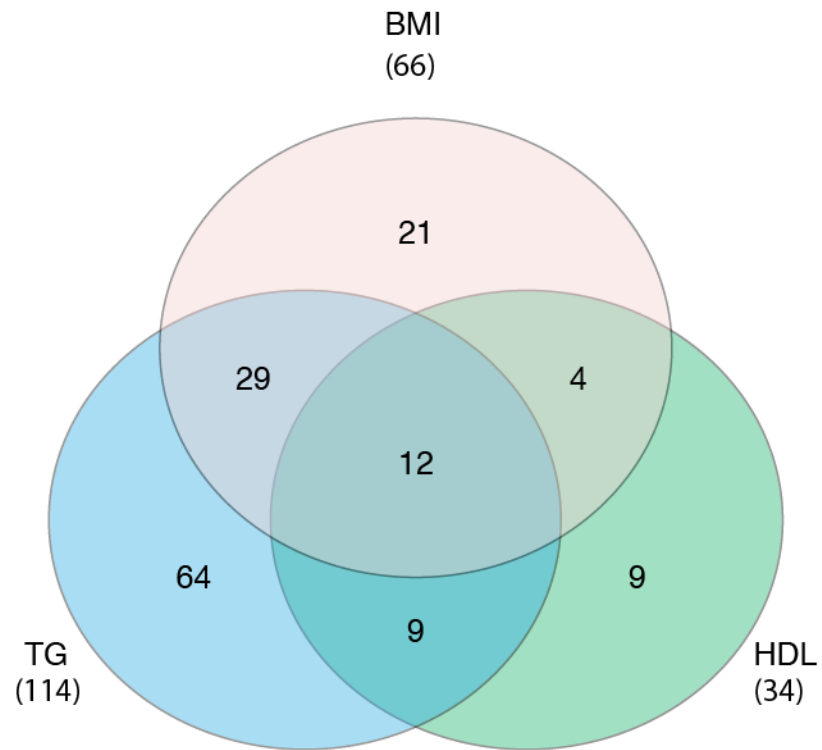

**Online Figure III. The amount of variance in BMI and lipids explained by the gut microbiome**

The x-axis refers to the different significance levels at which OTUs were identified. The Y-axis refers to the variance explained by the OTUs.

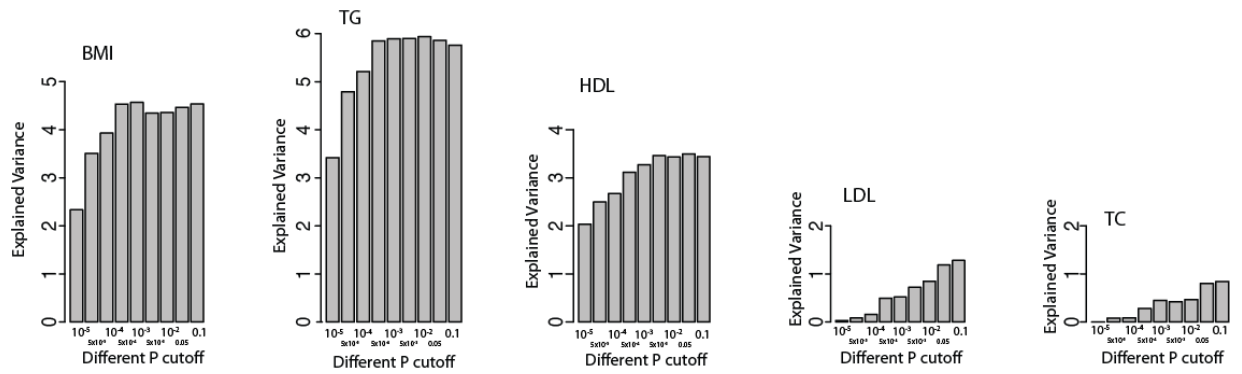



**Online Figure IV. The variation of lipids explained by age, gender, BMI, genetic and microbial risk.**

The significance of microbial contribution is indicated as the P value of the ANOVA test that compared the performance of the risk models  $r_3$  and  $r_4$ .

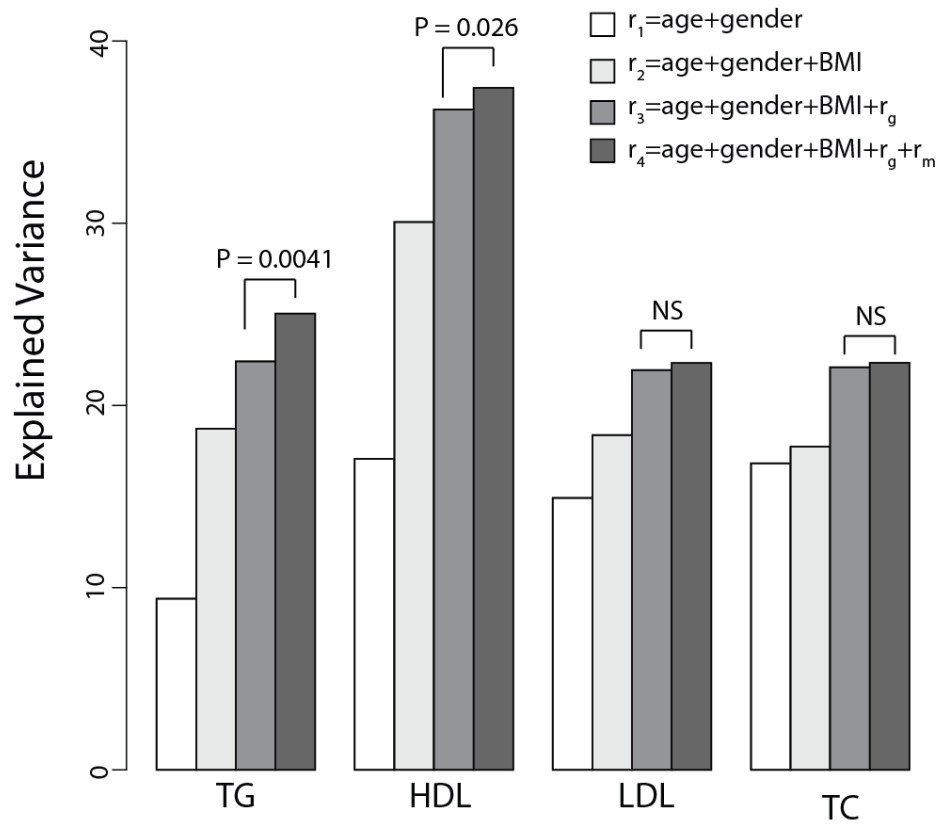

NS=not significant
